1           **Actomyosin-mediated apical constriction promotes**  
2                   **physiological germ cell death in *C. elegans***

3  
4   Tea Kohlbrenner<sup>1,2</sup>, Simon Berger<sup>1,3</sup>, Tinri Aegerter-Wilmsen<sup>1</sup>, Ana Cristina Laranjeira<sup>1,2</sup>,  
5   Andrew deMello<sup>3</sup>, Alex Hajnal<sup>1,\*</sup>

6  
7   <sup>1</sup>Institute of Molecular Life Sciences, University of Zürich, Winterthurerstrasse 190, CH-8057  
8   Zürich, Switzerland

9   <sup>2</sup>Molecular Life Science PhD Program, University and ETH Zürich, CH-8057 Zürich,  
10   Switzerland

11   <sup>3</sup>Institute for Chemical and Bioengineering, ETH Zürich, Vladimir-Prelog-Weg 1-5/10  
12   8093 Zürich, Switzerland

13   \*Corresponding author: [alex.hajnal@mls.uzh.ch](mailto:alex.hajnal@mls.uzh.ch)

14  
15   Keywords: *C. elegans*, apoptosis, germ cells, MAP kinase, apical constriction, actomyosin  
16   network

18 **Abstract**

19 **Germ cell apoptosis in *C. elegans* hermaphrodites is a physiological process eliminating**  
20 **around 60% of all cells in meiotic prophase to maintain tissue homeostasis. In contrast to**  
21 **programmed cell death in the *C. elegans* soma, the selection of germ cells undergoing**  
22 **apoptosis is stochastic.**

23 **By live-tracking individual germ cells at the pachytene stage, we found that germ cells**  
24 **smaller than their neighbors are selectively eliminated through apoptosis before**  
25 **differentiating into oocytes. Thus, cell size is a strong predictor of physiological germ cell**  
26 **death. The RAS/MAPK and ECT/RHO/ROCK pathways together regulate germ cell size**  
27 **by controlling actomyosin constriction at the apical rachis bridges, which are cellular**  
28 **openings connecting the syncytial germ cells to a shared cytoplasmic core. Enhancing**  
29 **apical constriction reduces germ cell size and increases the rate of cell death while**  
30 **inhibiting the actomyosin network in the germ cells prevents their death. We propose that**  
31 **actomyosin contractility at the rachis bridges of the syncytial germ cells amplifies**  
32 **intrinsic disparities in cell size. Through this mechanism, animals can adapt the rate of**  
33 **germ cell death and differentiation to changing environmental conditions.**

## 34 **Introduction**

35 Programmed cell death, commonly called apoptosis, is an evolutionary conserved process that  
36 is essential for the development, morphogenesis and survival of most multicellular organisms  
37 [1–4]. During *C. elegans* embryonic and larval development, an invariant set of 131 somatic  
38 cells is eliminated through programmed cell death as part of normal development [5–10]. In  
39 addition, in adults grown under standard conditions, around 60% of the germ cells at the  
40 pachytene stage of meiotic prophase I are eliminated by apoptosis before they can enter  
41 oogenesis [11–13]. Germ cell corpses are rapidly engulfed and digested by the somatic sheath  
42 cells that form the walls of the tubular gonad arms [11,14,13]. Unlike the programmed death  
43 of somatic cells, the death of meiotic germ cells in adult hermaphrodites occurs randomly. The  
44 elimination of healthy germ cells by apoptosis is a physiological process that is thought to  
45 remove excess cells to maintain tissue homeostasis and redistribute resources among the  
46 surviving germ cells [11,15]. While programmed, somatic and physiological germ cell death  
47 utilize the same core cell death (CED) machinery to execute apoptosis via CED-3 Caspase  
48 activation [5], the signals by which individual germ cells are selected to die have so far  
49 remained unknown.

50 The gonads of *C. elegans* hermaphrodites are formed by two U-shaped tubes each connected  
51 to a common uterus [16]. One gonad arm in adult animals contains around 1'000 germ cells  
52 arranged in a distal to proximal polarity (**Fig. 1A**) [17]. Germ cells in the distal gonad and the  
53 loop region form a large syncytium, in which the germ cell nuclei are only partially enclosed  
54 by plasma membranes. Each syncytial germ cell is connected on its apical side through an  
55 opening, called rachis bridge, to a common cytoplasmic core, the rachis (**Fig. 1A' & A''**) [16].  
56 The rachis bridges are lined with contractile actomyosin rings, which can constrict to close the  
57 openings to the rachis, thereby regulating the exchange of cytoplasm between germ cells and  
58 rachis [18,19]. The size of the rachis bridges is dynamically regulated according to the meiotic  
59 stage of the cells. The rachis bridges first constrict as cells pass through the mid to late  
60 pachytene region, after which they enlarge in cells that exit pachytene and enter  
61 diakinesis/diplotene in the loop region until they are fully constricted to cellularize the  
62 maturing oocytes [19].

63 Signals transduced by the RHO family of small GTPases regulate cell shape in a variety of  
64 processes, including gastrulation, cytokinesis, cell migration and epithelial morphogenesis. In  
65 most of these processes, the activation of RHO signaling by extracellular or cell-intrinsic  
66 signals induces the constriction of the cortical actomyosin network to generate intracellular

67 forces, which alter cell shape [20–22]. One of the central downstream effectors is the RHO-  
68 dependent kinase ROCK, which induces actomyosin constriction by phosphorylating the  
69 regulatory myosin light chain (MLC) subunit. In the *C. elegans* germline, actomyosin  
70 contractility is regulated by the RHO Guanine Exchange Factor (GEF) ECT-2 and the RHO-1  
71 small GTPase that activates the ROCK homolog LET-502, which phosphorylates the myosin  
72 regulatory light chain MLC-4 [23–25]. Phosphorylated, activated MLC-4 in a complex with  
73 the essential light chain MLC-5 and the myosin heavy chain NMY-2 induces constriction of  
74 the F-actin cytoskeleton [26]. MLC-4 can also be activated through a RHO/ROCK-independent  
75 pathway composed of the p21-activated kinase PAK-1 and its activator PIX-1 [26–28].  
76 Germline stem cells in the distal-most mitotic zone are induced by a DELTA/NOTCH signal  
77 from the distal tip cell (DTC) to proliferate (**Fig. 1A**) [17]. As the germ cells migrate  
78 proximally, they enter the pachytene stage of meiotic prophase I. While progressing through  
79 the pachytene region, germ cells receive external signals via the DAF-2 insulin receptor (InsR),  
80 which activates the RAS/MAPK pathway [29]. RAS/MAPK signaling is not only necessary  
81 for the surviving germ cells to exit pachytene and differentiate into mature oocytes but also for  
82 germ cell death, which occurs almost exclusively in the mid to late pachytene region (**Fig. 1A**)  
83 [11,13,30]. The mechanisms, by which MAPK activation triggers the apoptosis of individual  
84 germ cells, remain unknown.  
85 Here, we show that RAS/MAPK signaling is necessary for NMY-2 myosin enrichment at the  
86 rachis bridges to promote apical germ cell constriction and reduce germ cell size. Smaller germ  
87 cells are then selectively eliminated by apoptosis and donate their cytoplasm to surviving germ  
88 cells, which grow in size [31,32]. Based on these findings, we propose that global actomyosin  
89 contractility in the syncytial germline, determined by the joint activities of the RAS/MAPK  
90 and ECT/RHO/ROCK signaling pathways, determines the rate of physiological germ cell  
91 death.

92

## 93 **Results**

### 94 **Germ cell size decreases before corpse formation**

95 To observe germ cells undergoing apoptosis, we used a custom-made microfluidic device,  
96 which allowed us to perform long-term imaging and follow the fates of individual germ cells  
97 under physiological conditions [12]. Germ cells in the pachytene stage of meiotic prophase I  
98 were tracked over 7 hours in young adult wild-type animals starting 72 hours after the L1 stage,  
99 using the *syn-4>syn-4::gfp* membrane marker (*xnIs87*) to outline the cell borders and DIC

100 optics to visualize apoptotic corpses. Image stacks were acquired every 7.5 minutes, and 2.5D  
101 projections of the basal germ cell surfaces were created using MorphographX software [33]  
102 (**suppl. Fig. S1C** and the **Extended Methods** section). The basal projections of the consecutive  
103 time points were manually aligned, such that individual germ cells could be color-coded and  
104 tracked over time (**Fig. 1B-E** and **suppl. Movie S1**).

105 Analysis of a total of 155 germ cells tracked in three animals revealed that the basal surface  
106 area of germ cells undergoing apoptosis decreased prior to the appearance of a cell corpse in  
107 the DIC image (time-point 0' in **Fig. 1D**), whereas the surviving neighboring cells increased in  
108 size as they moved proximally (**Fig. 1F** and **suppl. Fig. S1A, B**). Relative to their surviving  
109 neighbors, cells fated to die started to shrink 1 to 2 hours before apoptotic corpses became  
110 visible (**Fig. 1G**). The average basal area of the 16 apoptotic germ cells that could be tracked  
111 until corpse formation was  $21 \pm 6 \mu\text{m}^2$  at the last time frame before they were eliminated. When  
112 the basal area dropped below  $20 \mu\text{m}^2$ , cells formed a corpse within an hour with a probability  
113 of 58%, compared to a probability of 1% for cells with a basal area greater than  $20 \mu\text{m}^2$ .  
114 Therefore, a basal area below  $20 \mu\text{m}^2$  may serve as a predictor for imminent apoptosis. By  
115 creating projections of increasing depths, we found that the basal and apical membrane  
116 domains of pre-apoptotic cells decreased simultaneously, while their height did not increase,  
117 indicating a reduction in the total volume of pre-apoptotic germ cells (**suppl. Fig. S1D, E**).

118 Next, we used an endogenous reporter for the non-muscle myosin *nmy-2* (*nmy-2::gfp(cp13)*)  
119 [34] to visualize the rachis bridges on the apical side of the syncytial germ cells together with  
120 a *pie-1>mCherry::PLCA<sup>PH</sup>* membrane reporter (*itls37*) to label the plasma membranes. The  
121 apical actomyosin rings were fully constricted 30 to 45 minutes before corpse formation,  
122 leading to the full cellularization of apoptotic cells before corpse formation (**Fig. 1H-K**).  
123 Cellularized germ cells were characterized by a round rather than a honeycomb shape on their  
124 basal surface (see the -45' time-point in **Fig. 1C**).

125 Taken together, our long-term tracking experiments indicated that germ cells fated to die  
126 undergo apical constriction and reduce their size 1 to 2 hours before forming apoptotic corpses,  
127 which are engulfed by the somatic sheath cells. However, these observations could not  
128 distinguish if the reduction in germ cell size is merely a consequence or also a cause of the  
129 apoptotic fate.

Figure 1

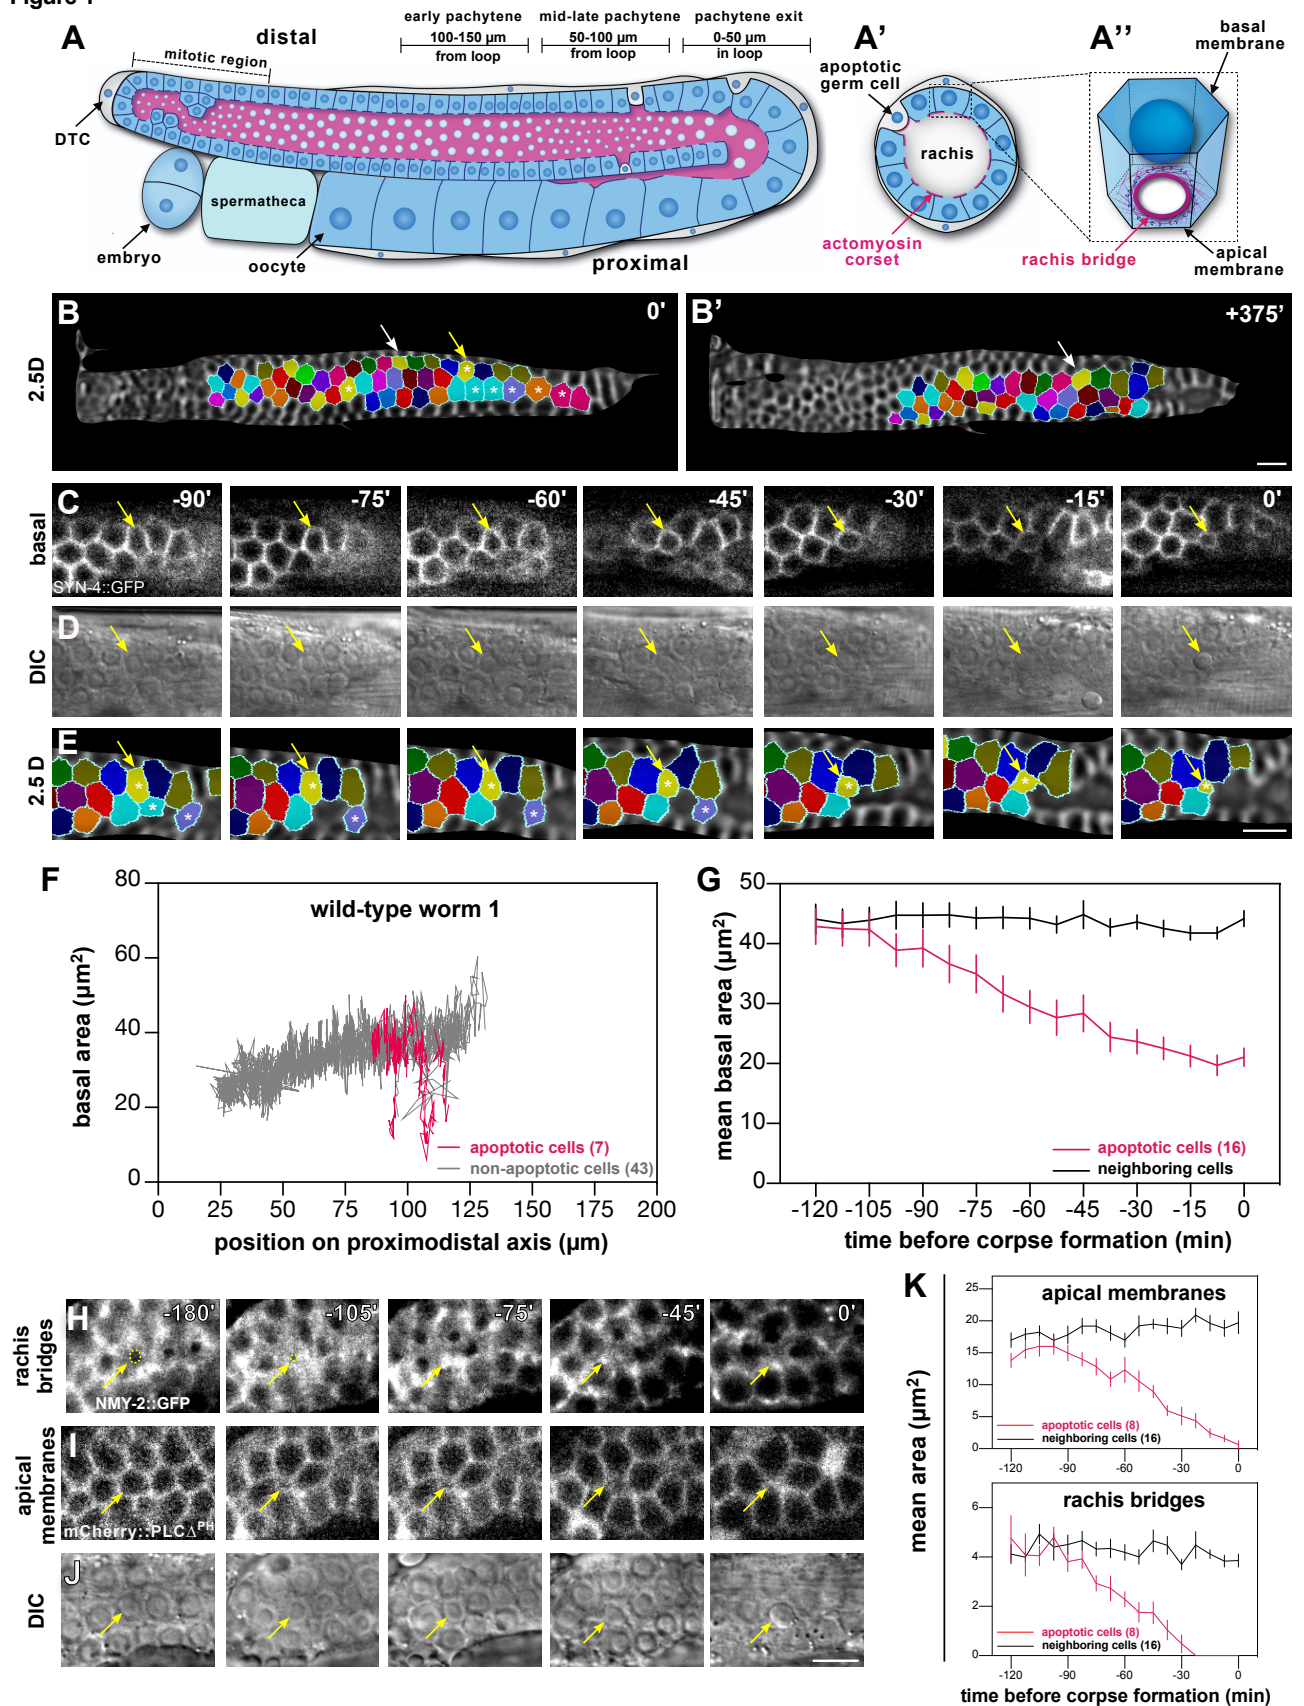

130

131 **Figure 1. Germ cell size decreases before corpse formation.**

132 (A) Schematic drawing of a single gonad arm, oriented with its distal end on the top left and  
133 the proximal end on the bottom left side, with (A') showing a cross-section through the  
134 pachytene region and (A'') a single germ cell with its rachis bridge. Live germ cells are  
135 indicated with a blue cytoplasm, while the cytoplasm of apoptotic germ cells and the somatic  
136 sheath cells are colored gray. The actomyosin corset lining the apical germ cell membranes  
137 and the rachis bridges is shown in magenta. The three zones used for measurements in the  
138 following figures are indicated as “0-50  $\mu\text{m}$  in the loop” (pachytene exit of survivors), “50-100  
139  $\mu\text{m}$  from the loop” (mid to late pachytene), and “100-150  $\mu\text{m}$  from the loop” (early pachytene).  
140 (B) Start (0 minutes) and (B') endpoint (+375 minutes) of a germ cell tracking experiment in  
141 the wild-type showing the color-coded germ cells in 2.5D projections of the basal membrane  
142 surface. See **suppl. Movie S1** for all time frames. The yellow arrow in (B) points to a pre-  
143 apoptotic germ cell that was tracked as shown in the magnified images in (C-E), while the  
144 white arrows in (B) and (B') point to a surviving germ cell. The white asterisks highlight other  
145 cells that underwent apoptosis during the recording. (C) shows single z-sections, (D) the  
146 corresponding DIC images, and (E) the segmented cells on the 2.5D projections. (F) Basal  
147 areas of cells were tracked in a single wild-type animal and plotted against their relative  
148 positions along the distal to proximal axis. The traces of apoptotic cells are shown in magenta  
149 and those of surviving cells or of cells that did not die during the recording are shown in gray.  
150 Therefore, small germ cells in **Fig. 1F** and **suppl. Fig. S1A, B** that could not be tracked until  
151 corpse formation are also labeled in black. See **suppl. Fig. S1A, B** for traces of two additional  
152 animals. (G) Mean basal cell area  $\pm$ SEM of apoptotic germ cells tracked in three wild-type  
153 animals (magenta line) and their neighboring cells (black line) plotted against the relative time  
154 before an apoptotic cell corpse was first detected in the DIC channel. Neighboring cells were  
155 defined as cells within 16  $\mu\text{m}$  (corresponding to approximately two cell diameters) from the  
156 center of the apoptotic cells. (H) Time-lapse observation of the rachis bridges outlined with the  
157 NMY-2::GFP reporter, (I) the apical plasma membranes labeled with the mCherry::PLC $\Delta^{\text{PH}}$   
158 reporter, and (J) the corresponding DIC images in wild-type. For each channel, a single z-  
159 section is shown. The yellow arrows point to a cell undergoing apoptosis. The yellow dashed  
160 circles in (H) outline the rachis bridge of the apoptotic cell. (K) Mean area  $\pm$ SEM of the rachis  
161 bridges and the apical plasma membrane in apoptotic cells (magenta lines) and their left and  
162 right neighbors (black line), plotted against the relative time before corpse formation. A mean  
163 rachis bridge area of 0 indicates full constriction. In each graph, the numbers in brackets refer  
164 to the total number of cells analyzed. The scale bars are 10  $\mu\text{m}$ .  
165

166 **CED-3 is necessary for the formation of small germ cell size**

167 To investigate the influence of the CED pathway (Cell Death abnormal) on germ cell size, we  
168 tracked germ cells in apoptosis-deficient *ced-3(n717lf)* caspase mutants [35] using the same  
169 approach as for the wild-type (**Fig. 1B**). Data for 176 germ cells tracked in three animals  
170 indicated that no germ cells that were consistently smaller than their neighbors were present in  
171 the pachytene region of *ced-3* loss-of-function (*lf*) mutants (**suppl. Movie S2**). Cell size  
172 measurements (**suppl. Fig. S1C**) confirmed the loss of the small cell population (basal cell area  
173 below  $20 \mu\text{m}^2$ ) in *ced-3(lf)* mutants, especially in the mid to late pachytene region (50-100  $\mu\text{m}$   
174 from the loop), where most apoptotic cell death occurs in the wild-type (**Fig. 2A, B** and **suppl.**  
175 **Fig. S2A, B**).

176 We further examined the localization of actomyosin network components in apoptotic corpses  
177 using endogenous reporters for the RHO Guanine Exchange Factor (GEF) ECT-2 and the RHO  
178 kinase LET-502, along with the non-muscle myosin NMY-2 marker and a germline-specific  
179 LifeAct F-actin reporter. All these actomyosin pathway components were strongly enriched at  
180 the cortex of dying cells (**Fig. 2C-F'**). Possibly, the overall size reduction of dying cells may  
181 have contributed to the compaction of the actomyosin network.

182 Taken together, these data suggest that the full activation of the CED pathway in pachytene  
183 stage germ cells is necessary for the formation of small germ cells ( $<20 \mu\text{m}^2$  basal surface) that  
184 undergo apoptosis. Dying germ cells exhibit an enhanced accumulation of actomyosin  
185 regulators at their cortex, which causes them to fully constrict and cellularize.

186



Figure 2

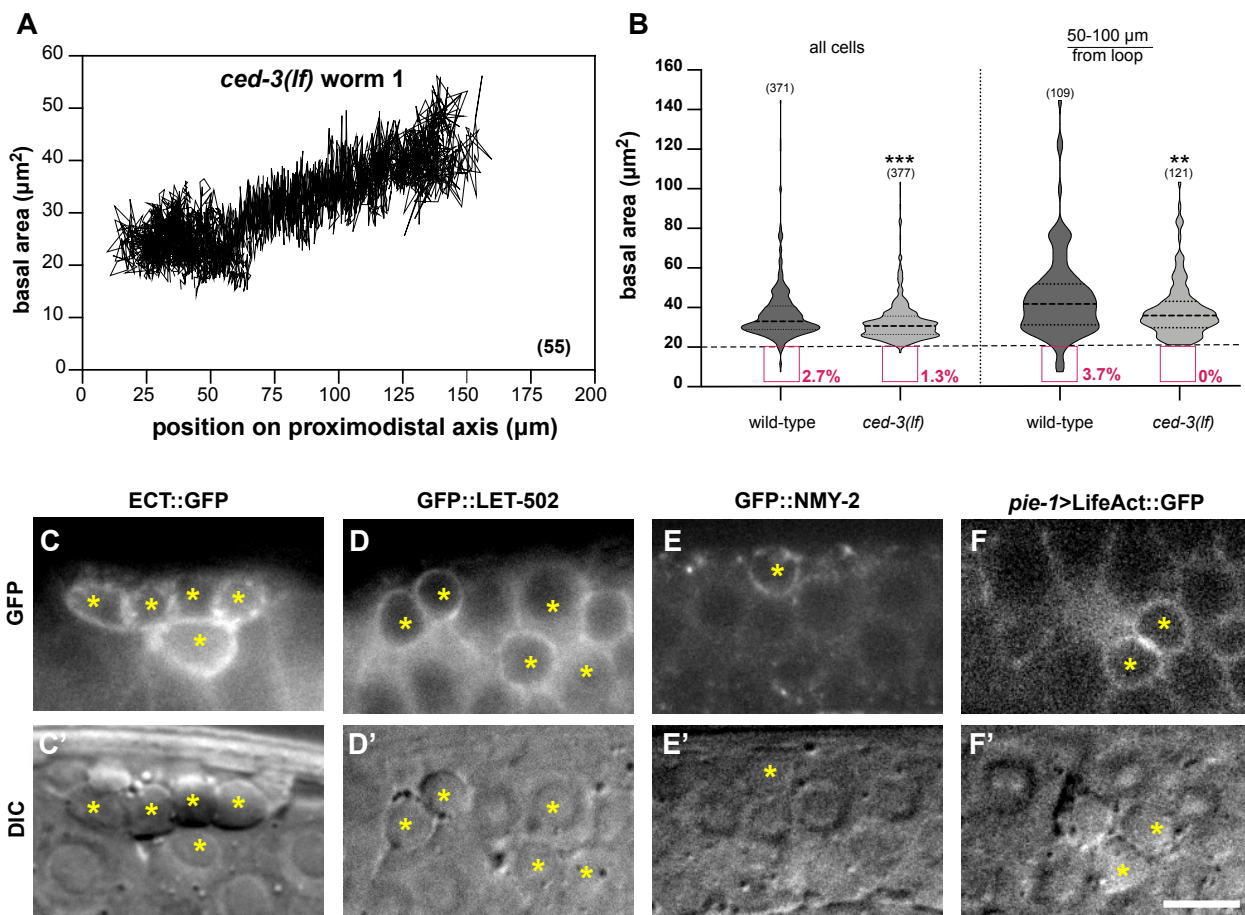

187

188 **Figure 2. CED-3 Caspase reduces germ cell size.**

189 (A) Basal areas of all cells tracked in a *ced-3(lf)* mutant plotted against their relative positions  
 190 along the distal to proximal axis. Note the absence of small germ cells observed in the wild-  
 191 type traces in **Fig. 1F**. See **suppl. Fig. S2A, B** for the traces of two additional *ced-3(lf)* animals.  
 192 (B) Violin plots of the basal cell area measured in one-day-old wild-type and *ced-3(lf)* mutants  
 193 (8 animals each) in the 0-150  $\mu\text{m}$  region (left) or the mid to late pachytene region (right). The  
 194 red boxes outline the small cells (area < 20  $\mu\text{m}^2$ ) and their frequencies. (C) Cortical enrichment  
 195 of the endogenous ECT-2::GFP, (D) GFP::LET-502 and (E) NMY-2::GFP reporter signals,  
 196 and (F) a germline-specific transgenic *pie-1>lifeAct::GFP* F-actin marker around apoptotic  
 197 corpses in one-day-old adults. The bottom panels (C'-F') show the corresponding DIC images  
 198 and the yellow asterisks indicate apoptotic cell corpses. Dashed lines in the violin plots indicate  
 199 the median values and the dotted lines the upper and lower quartiles. The numbers in brackets  
 200 in each graph refer to the total number of cells analyzed. Statistical significances were  
 201 calculated with unpaired two-tailed t-tests (**suppl. Tab. S1**). \*\* indicates  $p < 0.01$  and \*\*\* for  
 202  $p < 0.001$ . Scale bar in (F') is 10  $\mu\text{m}$ .

203 **Actomyosin-mediated apical constriction promotes germ cell death**

204 In many cases, programmed cell death is accompanied by a loss of cell volume [36]. However,  
205 it is not known if apoptotic signals are the cause of cell shrinkage, or if a reduction in cell size  
206 can also trigger the activation of pro-apoptotic pathways. Since we found that germ cells  
207 undergo apical constriction and reduce in size before forming apoptotic corpses and since  
208 apoptotic corpses are enriched in actomyosin regulators, we tested if altering actomyosin  
209 contractility in the germline affects the rate of physiological germ cell death.

210 We first examined if an increase in actomyosin contractility is sufficient to reduce germ cell  
211 size and promote germ cell death. To test this, we used a gain-of-function (*gf*) mutation in *ect-*  
212 *2(zh8gf)*, which encodes a guanine-nucleotide exchange factor that activates the RHO-1 small  
213 GTPase [23], combined either with the SYN-4::GFP membrane marker to observe germ cell  
214 size or with a CED-1::GFP reporter to score germ cell apoptosis [14,37]. CED-1 is a type 1  
215 trans-membrane receptor expressed in the sheath cells of the somatic gonad that recognizes  
216 and clusters around dying cells before they are engulfed [38]. *ect-2(gf)* mutants contained a  
217 large number of very small germ cells from the mid to late pachytene region onwards (magenta  
218 dots in **Fig. 3B**), interspersed with a few large cells (blue dots) as well as regions devoid of  
219 nuclei (green arrowheads, see **suppl. Fig. S3C, D** for full gonad views). Furthermore, many  
220 small germ cells were found in the central rachis region, which normally contains only  
221 cytoplasm (yellow dots in the mid-sagittal layer and the yz-views in **Fig. 3B**).

222 We next tested if the formation of small germ cells in *ect-2(gf)* mutants requires *ced-3 caspase*  
223 activity. Small germ cells continued to accumulate in *ect-2(gf); ced-3(lf)* double mutants,  
224 indicating that *ect-2* controls germ cell size independently of the CED-pathway (**Fig. 3C** and  
225 **suppl. Fig. S3E, F**). Interestingly, both in *ect-2(gf)* single and *ect-2(gf); ced-3(lf)* double  
226 mutants small germ cells were only present from the mid to late pachytene region on towards  
227 the proximal region (**suppl. Fig. S3C-F**). Thus, activation of the ECT/RHO/ROCK pathway  
228 alone is not sufficient to reduce germ cell size in more distal regions, as apical constriction may  
229 depend on another signal received by germ cells progressing through pachytene.

230 *ect-2(gf)* mutants exhibited a strong increase in the number of apoptotic germ cells detected by  
231 the CED-1::GFP reporter (**Fig. 3D**). To determine if the elevated number of apoptotic germ  
232 cells in *ect-2(gf)* mutants was due to DNA damage-induced or physiological cell death, we  
233 introduced a loss-of-function (*lf*) mutation in the p53 homolog *cep-1* [39]. *cep-1(gk138lf)*  
234 mutants do not show an increase in germ cell death after DNA damage, while physiological  
235 germ cell death occurs normally [30]. *ect-2(gf); cep-1(lf)* double mutants exhibited a significant

236 increase in the number of apoptotic germ cells compared to *cep-1(lf)* single mutants and only  
237 a slight reduction relative to *ect-2(gf)* single mutants (**Fig. 3D**). Besides inducing actomyosin  
238 contractility, ECT-2 also regulates the disassembly of the synaptonemal complexes in  
239 pachytene stage germ cells [40]. Therefore, the increased germ cell death observed after hyper-  
240 activation of ECT-2 could be due to chromosome pairing defects. To test this possibility, we  
241 examined the effect of a *lf* mutation in *pch-2*, which encodes a component of a meiotic  
242 checkpoint that activates apoptosis if un-synapsed chromosomes are detected [41]. *ect-2(gf)*  
243 *pch-2(tm1458)* mutants showed a significant increase in germ cell death compared to *pch-*  
244 *2(tm1458)* single mutant and no decrease relative to *ect-2(gf)* single mutants (**suppl. Fig. S3G**).  
245 By contrast, very few apoptotic corpses were detected in *ect-2(gf); ced-3(lf)* double mutants  
246 (**suppl. Fig. S3H**). Thus, the increased number of apoptotic corpses observed in *ect-2(gf)*  
247 mutants is predominantly caused by enhanced physiological germ cell death.  
248 We then reduced the activities of different actomyosin regulators and scored germ cell death  
249 as well as apical germ cell constriction by measuring the size of the apical NMY-2::GFP rings  
250 on the rachis bridges. Global RNAi against the RHO-dependent kinase *let-502 rock* [24,25]  
251 from the L1 stage onwards increased the sizes of the rachis bridges in pachytene stage germ  
252 cells, as reported previously [19], without perturbing the cellular integrity as examined with  
253 the mCherry::PLC $\Delta^{\text{PH}}$  plasma membrane marker (**Fig. 3E-G**, see **suppl. Fig. S3I** and  
254 **Extended Methods** for the quantification of rachis bridge areas). By contrast, constitutive  
255 RNAi against the *rho* *gfect-2* or the non-muscle myosin *nmy-2* caused a severe disruption of  
256 gonad morphology such that the apical actomyosin corset and lateral germ cell membranes  
257 collapsed, precluding the quantification of germ cell death and apical constriction.  
258 We therefore performed germline-specific RNAi, using a strain expressing the Argonaute  
259 protein RDE-1 exclusively in the germ cells [42] and the CED-1::GFP marker to score germ  
260 cell death. Germline-specific RNAi against *nmy-2*, *ect-2* or *let-502* from the L4 stage decreased  
261 the number of CED-1::GFP positive cells in one-day-old adults when compared to empty  
262 vector-treated control animals (**Fig. 3H**). It should be noted that the stronger decrease in CED-  
263 1::GFP positive germ cells after *ect-2* RNAi, but not *nmy-2* or *let-502* RNAi, may in part be  
264 due to the collapse of the plasma membranes since the gonad architecture appeared  
265 disorganized and clumps of nuclei formed in around 70% of *ect-2* RNAi treated animals. Also,  
266 a transient 4-hour-long inactivation of NMY-2 using the temperature-sensitive *nmy-*  
267 *2(ne1490ts)* allele [43] caused a reduction in the number of CED-1::GFP positive cells at the  
268 restrictive temperature (**Fig. 3I**).

269 Taken together, these data indicate that a decrease in actomyosin contractility increases the size  
270 of the apical rachis bridges and reduces germ cell apoptosis, while hyper-activation of the  
271 ECT/RHO/ROCK pathway is sufficient to increase the rate of germ cell apoptosis. Thus, apical  
272 germ cell constriction promotes physiological germ cell death.

Figure 3

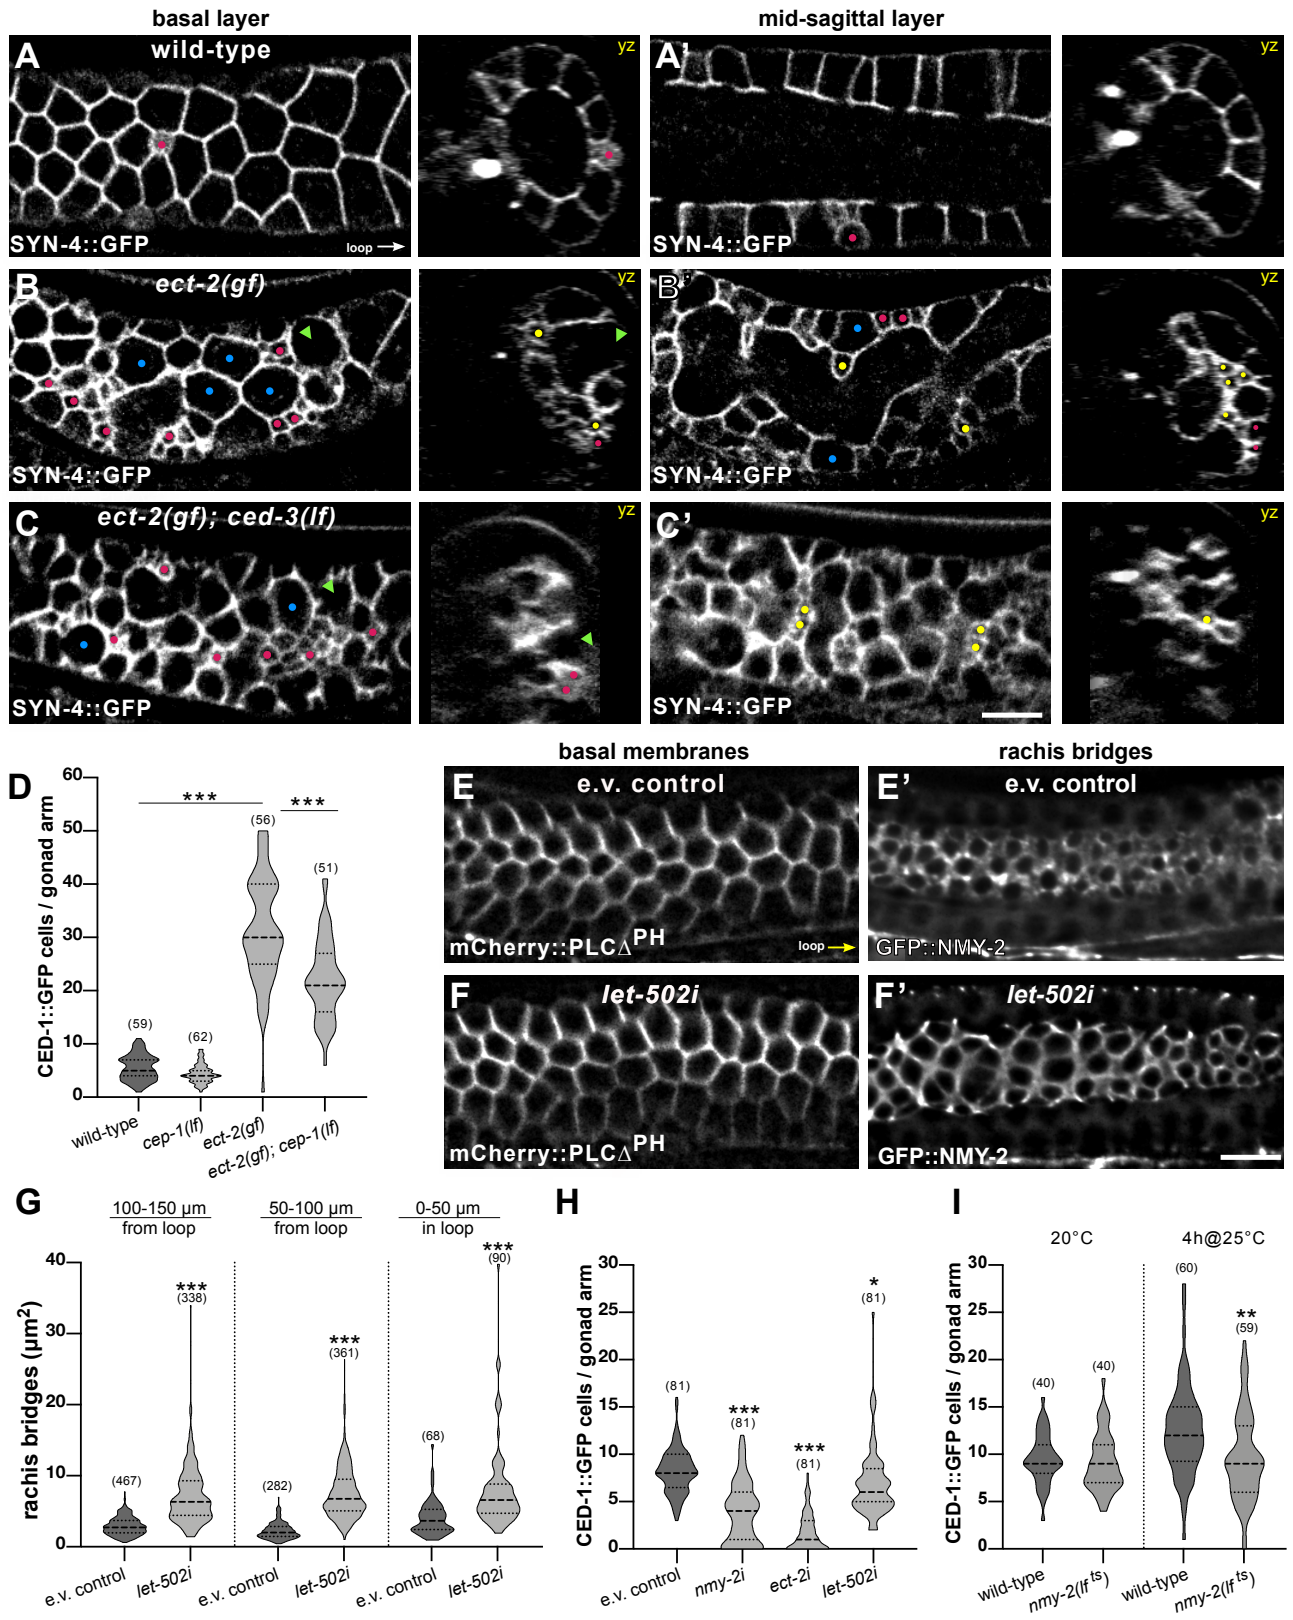

273

274 **Figure 3. Actomyosin-mediated apical constriction promotes germ cell death.**  
275 Germ cell shapes visualized with the SYN-4::GFP plasma membrane marker in (A) wild-type,  
276 (B) *ect-2(gf)* single and (C) *ect-2(gf); ced-3(lf)* double mutants. For each genotype, optical  
277 sections of the basal surface (A-C) and the mid-sagittal layers (A'-C') are shown along with  
278 the corresponding yz-projections. Magenta dots highlight some of the small cells localized on  
279 the surface, yellow dots some of the small cells inside the rachis, blue dots some large cells,  
280 and green arrowheads regions devoid of cells. (D) Violin plot showing the number of CED-  
281 1::GFP positive apoptotic germ cells per gonad arm in one-day-old adults of the indicated  
282 genotypes. (E) Basal germ cell surfaces visualized with the mCherry::PLC $\Delta^{\text{PH}}$  membrane  
283 marker and (E') the apical rachis bridges outlined with the NMY-2::GFP marker in animals  
284 treated with the empty vector (e.v.) as negative control and (F, F') after global *let-502 rock*  
285 RNAi from the L1 stage on until adulthood. (G) Violin plot showing the size of the rachis  
286 bridges in the three indicated gonad regions in empty vector controls and after global *let-502*  
287 RNAi for 72 hours in one-day-old adults, quantified as illustrated in **suppl. Fig. S3H**. Twelve  
288 animals were analyzed for e.v. controls and 13 animals for *let-502i*. (H) CED-1::GFP positive  
289 apoptotic germ cells per gonad arm in one-day-old adults after germline-specific RNAi of the  
290 indicated genes. Animals were exposed to dsRNA-producing bacteria from the L4 stage for 24  
291 hours. (I) CED-1::GFP positive cells per gonad arm in one-day-old wild-type and temperature-  
292 sensitive *nmy-2(lf<sup>ts</sup>)* mutants at the permissive temperature (20°C, left) and after a 4-hour up-  
293 shift to the restrictive temperature (4h@25°C, right). Dashed lines in the violin plots indicate  
294 the median values and the dotted lines the upper and lower quartiles. For the rachis bridges,  
295 the numbers in brackets refer to the number of cells analyzed, and for the CED-1::GFP reporter,  
296 the number of animals scored. Statistical analysis was done by one-way ANOVA followed by  
297 a Tukey's test for multiple comparisons for **Fig. 3D, H, I** or with an unpaired two-tailed t-test  
298 for **Fig. 3G (suppl. Tab. S1)**. \* indicates  $p < 0.05$ , \*\*  $p < 0.01$  and \*\*\*  $p < 0.001$ . Scale bars  
299 are 10  $\mu\text{m}$ .  
300

301 **RAS/MAPK signaling promotes physiological germ cell death**

302 Previous studies have shown that the RAS/MAPK pathway is an essential regulator of  
303 physiological and damage-induced germ cell death [11,30,44]. An increase in MAPK activity  
304 at the late pachytene stage results in the formation of more but smaller oocytes and an elevated  
305 number of apoptotic corpses, while reduced MAPK activity delays pachytene exit and reduces  
306 the number of oocytes in the proximal gonads [11,45–48]. The consequences of reducing  
307 MAPK activity on germ cell apoptosis are controversial. Some studies observed reduced  
308 apoptosis [11,30,45], while Das et al. [48] reported increased apoptosis after inhibition of the  
309 MAP kinase MPK-1 using the temperature-sensitive *mpk-1(ga111)* allele [49].

310 Consistent with the previous reports, we observed an elevated number of CED-1::GFP positive  
311 germ cells after transient hyper-activation of the RAS/MAPK pathway by growing  
312 temperature-sensitive *let-60 ras(ga89<sup>ts</sup>)* gain-of-function mutants [50] (abbreviated *let-60*  
313 *ras(gf<sup>ts</sup>)*) for 4 hours at the restrictive temperature of 25°C (**Fig. 4A**). The increase in germ cell  
314 apoptosis was independent of *cep-1* and *pch-2*, indicating that elevated RAS/MAPK signaling  
315 stimulates physiological germ cell death, rather than activating a DNA damage response or  
316 meiotic checkpoint (**Fig. 4A, suppl. Fig. S4B**). On the other hand, germ cell death in *let-60*  
317 *ras(gf<sup>ts</sup>)* mutants completely depended on *ced-4* activity (**suppl. Fig. S4A**), indicating that  
318 RAS/MAPK signaling promotes germ cell death via the canonical CED pathway [7,11].

319 To score germ cell death after reduced RAS/MAPK signaling in the germline, we first  
320 performed germline-specific RNAi knock-down of the MAPK *mpk-1* and observed a slight  
321 reduction in the number of CED-1::GFP positive germ cells (**Fig. 4B**). By contrast, global  
322 reduction of MPK-1 activity in the soma and the germline using the temperature-sensitive *mpk-*  
323 *1(ga111<sup>ts</sup>)* reduction-of-function allele [49] (abbreviated *mpk-1(lf<sup>ts</sup>)*) did not result in a  
324 significant change in the number of CED-1::GFP positive germ cells (**Fig. 4B**). However, a  
325 strain carrying the *mpk-1(lf<sup>ts</sup>)* allele and simultaneously expressing the somatic *mpk-1a* isoform  
326 from an extrachromosomal array exhibited a significantly reduced number of CED-1::GFP  
327 positive germ cells at the restrictive temperature (**Fig. 4B and suppl. Fig. S4C**). Possibly, the  
328 somatic *mpk-1a* isoform plays a role in the gonadal sheath cells, for example during the clearing  
329 of apoptotic corpses. Hence, if MAPK signaling is simultaneously reduced in the soma and  
330 germline, a decrease in germ cell apoptosis may be compensated for by reduced MPK-1A  
331 activity in the soma. To further distinguish between the activities of the somatic *mpk-1a* and  
332 the germline-specific *mpk-1b* isoforms, we generated the germline-specific *mpk-1b(zh164)*  
333 allele (abbreviated *mpk-1b(lf)*) by introducing a stop codon in the first exon of the *mpk-1b*

334 isoform (W4Stop, see **materials and methods**). Germline-specific *mpk-1b(lf)* mutants  
335 contained only a few CED-1::GFP positive cells (**Fig. 4B** and **suppl. Fig. S4C**).

336 Taken together, we propose that the somatic *mpk-1a* isoform may play a role in apoptotic  
337 corpse clearing, while the germline-specific *mpk-1b* isoform promotes physiological germ cell  
338 death.

339

#### 340 **Hyper-activation of RAS/MAPK signaling decreases basal germ cell area**

341 Hyperactivation of the RAS/MAPK pathway or enhanced RHO/ROCK signaling both resulted  
342 in an elevated rate of physiological germ cell death. These observations raised the possibility  
343 that enhancing RAS/MAPK signaling might also cause a reduction in germ cell size, which in  
344 turn would promote germ cell death. To test this hypothesis, we first performed RNAi against  
345 the non-muscle myosin NMY-2 in the temperature-sensitive *let-60(gf<sup>ts</sup>)* background and  
346 observed the CED-1::GFP marker to score germ cell apoptosis and the mCherry::PLCΔ<sup>PH</sup>  
347 membrane marker to assess plasma membrane integrity. RNAi against *nmy-2* was carried out  
348 for 24 hours from the L4 stage on, combined with a hyper-activation of *let-60 ras* signaling at  
349 25°C for the last four hours, or with a simultaneous 24-hour-long hyper-activation of *let-60 ras*  
350 from the L4 stage on. Both treatments decreased the number of CED-1::GFP positive germ  
351 cells (**Fig. 4C** and **suppl. Fig. S4D**). The increase in physiological germ cell death observed  
352 after hyper-activation of the RAS/MAPK pathway therefore depends, at least in part, on the  
353 activity of the actomyosin network.

354 We next examined germ cell size by observing the SYN-4::GFP plasma membrane marker in  
355 temperature-sensitive *let-60(gf<sup>ts</sup>)* mutants grown for 4 hours at the restrictive temperature.

356 Hyper-activation of the RAS/MAPK pathway resulted in the formation of more small germ  
357 cells (basal area below 20 μm<sup>2</sup>), especially at the late pachytene stage 50-100 μm before the  
358 loop (magenta boxes in **Fig. 4D** and dots in **Fig. 4E, F**). Also, the average size of all germ  
359 cells combined was reduced in *let-60(gf<sup>ts</sup>)* mutants (**Fig. 4D** and **suppl. Fig. S4E**).

360 The effect of the RAS/MAPK pathway on germ cell size may be indirect. For example,  
361 RAS/MAPK signaling could directly activate the pro-apoptotic CED pathway, which would  
362 cause apoptotic germ cells to shrink. Alternatively, RAS/MAPK signaling may regulate germ  
363 cell size through the actomyosin pathway independently of the CED pathway.

364 To distinguish between these two possibilities, we quantified germ cell sizes in *let-60(gf<sup>ts</sup>)*;  
365 *ced-4(lf)* double mutants, as well as in *ced-4(lf)* single mutants. Small germ cells (basal area  
366 below 20 μm<sup>2</sup>) accumulated in the pachytene region of *let-60(gf<sup>ts</sup>)*; *ced-4(lf)* double mutants



367 mostly inside the rachis (**Fig. 4D, H**), while *ced-4(lf)* single mutants did not contain any small  
368 germ cells (**Fig. 4D, G**), similar to *ced-3(lf)* mutants (**Fig. 2A, B**). Since an accurate  
369 quantification of germ cells inside the rachis was not possible using our MorphographX  
370 pipeline, the fraction of small cells shown in **Fig. 4D** for *let-60(gf<sup>ts</sup>); ced-4(lf)* double mutants  
371 is probably an underestimate, as it only includes small cells at the basal surface. Moreover, in  
372 the late pachytene region (50-100  $\mu\text{m}$  before the loop) the average germ cell size in *let-60(gf<sup>ts</sup>); ced-4(lf)*  
373 double mutants was significantly smaller than in *ced-4(lf)* single mutants and more  
374 similar to *let-60(gf<sup>ts</sup>)* single mutants, except for the reduced fraction of very small cells (**Fig.**  
375 **4D** and **suppl. Fig. S4E**).

376 To directly correlate germ cell size and apoptosis in *let-60(gf<sup>ts</sup>)* mutants, we compared the sizes  
377 of CED-1::GFP-positive cells to their CED-1::GFP-negative neighbors in the late pachytene  
378 region (50-100  $\mu\text{m}$ ) using the mCherry::PLC $\Delta^{\text{PH}}$  membrane marker (**Fig. 4I** and **Extended**  
379 **Methods**). Small germ cells (basal area below 20  $\mu\text{m}^2$ ) were more likely to be CED-1::GFP  
380 positive (73%) than larger cells. However, it should be noted that a population of CED-1::GFP  
381 negative small cells (16%) was also observed. Since the germ cell tracking experiments (**Fig.**  
382 **1**) indicated that germ cells with a basal area below 20  $\mu\text{m}^2$  have a 58% probability of forming  
383 an apoptotic corpse within one hour, the population of CED-1::GFP-negative small cells may  
384 contain pre-apoptotic cells that have not yet been engulfed.

385 Taken together, our data indicate that RAS/MAPK signaling decreases germ cell size  
386 independently of the CED pathway. The smaller germ cells generated in the wild-type or after  
387 hyper-activation of the RAS/MAPK pathway are more likely to be engulfed than their larger  
388 neighbors.

Figure 4

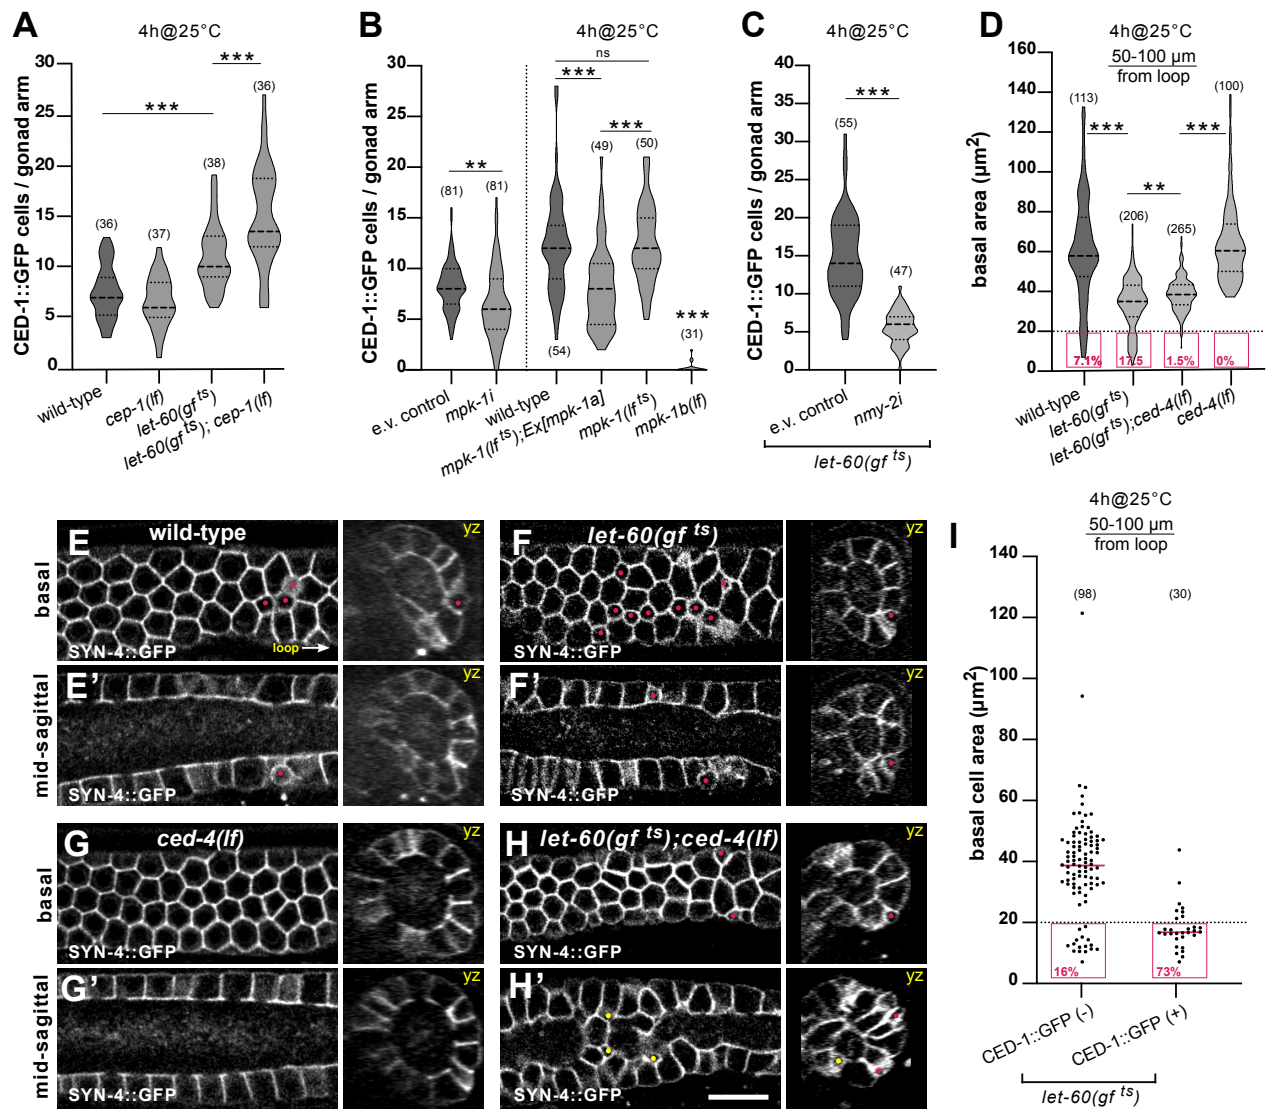

389

390 **Figure 4. RAS/MAPK signaling promotes apoptosis**

391 (A) Violin plot showing the number of CED-1::GFP positive apoptotic germ cells per gonad  
 392 arm in one-day-old adults of the indicated genotypes grown at 20°C for 68 hours and  
 393 subsequently up-shift for 4 hours to the restrictive temperature (4h@25°C). (B) CED-1::GFP  
 394 positive apoptotic germ cells in one-day-old adults after germline-specific RNAi of *mpk-1* for  
 395 24 hours from the L4 stage on (left) and in wild-type, temperature-sensitive *mpk-1(lf<sup>ts</sup>)* mutants  
 396 with or without the *Ex[mpk-1a]* transgene expressing the *mpk-1a* isoform in the soma, and the  
 397 germline-specific *mpk-1b(lf)* allele. Twenty hours post L4 the animals were grown for 4 hours  
 398 at the restrictive temperature of 25°C (4h@25°C, right side). Controls grown continuously at  
 399 20°C are shown in **suppl. Fig. S4C**. (C) CED-1::GFP positive apoptotic germ cells in one-day-  
 400 old adult *let-60(gf<sup>ts</sup>)* mutant treated with empty vector or *nmy-2i*. Animals were RNAi treated  
 401 for 24 hours from the L4 stage on and up-shifted to 25°C for the last 4 hours before scoring the  
 402 corpses (for 24 hours up-shift at 25°C see **Suppl. Fig. S4D**). (D) Violin plot of the basal cell  
 403 areas in the late pachytene region (50-100 μm from the loop) measured using MorphographX  
 404 in one-day-old adults of the indicated genotypes. Twenty hours post L4 the animals were grown

405 for 4 hours at the restrictive temperature of 25°C (4h@25°C). The magenta boxes outline the  
406 small cells (area < 20  $\mu\text{m}^2$ ) and their frequencies are shown as percentage values. Results of  
407 the size measurements in the other gonad regions are shown in **suppl. Fig. S4E**. Ten animals  
408 were analyzed for wild-type, 15 animals for *let-60(gf<sup>ts</sup>)*, 16 animals for *let-60(gf<sup>ts</sup>); ced-4(lf)*  
409 and 9 animals for *ced-4(lf)*. **(E)** Germ cell shapes visualized with the SYN-4::GFP plasma  
410 membrane markers in wild-type, **(F)** in *let-60(gf<sup>ts</sup>)*, **(G)** *ced-4(lf)* single, and in **(H)** *let-60(gf<sup>ts</sup>);*  
411 *ced-4(lf)* double mutant. For each genotype, optical sections of the basal surface **(E-H)** and  
412 the mid-sagittal layers **(E'-H')** are shown along with the corresponding yz-projections.  
413 Magenta dots highlight small cells localized on the surface and yellow dots small cells inside  
414 the rachis. **(I)** Basal cell areas in the late pachytene region (50-100  $\mu\text{m}$  region) of CED-1::GFP  
415 negative cells versus CED-1::GFP positive cells in one-day-old adults of *let-60(gf<sup>ts</sup>)* grown at  
416 20°C for 68 hours and incubated for 4 hours at the restrictive temperature of 25°C. Fifteen *let-*  
417 *60(gf<sup>ts</sup>)* animals were analyzed. Dashed lines in the violin plots indicate the median values and  
418 the dotted lines the upper and lower quartiles. For the measurements of the basal areas, the  
419 numbers in brackets refer to the numbers of cells analyzed, and for the CED-1::GFP reporter  
420 to the numbers of animals scored. Statistical analysis was done using one-way ANOVA  
421 followed by a Tukey's test for multiple comparisons or with an unpaired two-tailed t-test  
422 (**suppl. Tab. S1**). \*\* indicates  $p < 0.01$  and \*\*\*  $p < 0.001$  Scale bars are 10  $\mu\text{m}$ .

423 **RAS/MAPK signaling induces apical germ cell constriction**

424 We have previously reported that activation of the RAS/MAPK pathway by the EGF receptor  
425 induces apical constriction of the primary vulval precursor cells during morphogenesis of the  
426 hermaphrodite vulva [51]. This finding raised the possibility that RAS/MAPK signaling could  
427 also induce apical constriction at the rachis bridges of germ cells in the pachytene region to  
428 regulate germ cell size and death.

429 To investigate this hypothesis, we measured the sizes of the rachis bridges after hyper-  
430 activation or inhibition of RAS/MAPK signaling, by combining the temperature-sensitive *let-*  
431 *60(gf<sup>ts</sup>)* and *mpk-1(lf<sup>ts</sup>)* alleles with the endogenous NMY-2::GFP non-muscle myosin marker,  
432 which outlines the rachis bridges (**Fig. 5A**). In one-day-old adult *let-60(gf<sup>ts</sup>)* animals grown for  
433 4 hours at the restrictive temperature, the average area of the rachis bridges was decreased (**Fig.**  
434 **5A-C**) and **suppl. Fig. S5A, B**). In many cases, the NMY-2::GFP signal accumulated in single  
435 bright spots, which could not be quantified, on the apical side facing the rachis (yellow arrows  
436 in **suppl. Fig. S5A, B**), suggesting that the apical rachis bridges in those cells had already fully  
437 constricted. Conversely, in young adult *mpk-1(lf<sup>ts</sup>)* animals grown for 4 or 6 hours at the  
438 restrictive temperature, the average area of the rachis bridges was increased (**Fig. 5D-F** and  
439 **suppl. Fig. S5C-E**).

440 To study the effects of altered RAS/MAPK signaling on gonad architecture, we compared the  
441 heights of the germ cells as well as the rachis diameter in the pachytene region (50 to 150  $\mu\text{m}$   
442 from the loop) of wild-type, *let-60(gf<sup>ts</sup>)* and *mpk-1(lf<sup>ts</sup>)* mutants. To measure the average rachis  
443 diameters, the total areas of the regions shown in **Fig. 5J'-L'** were measured in mid-sagittal  
444 sections and divided by their length (100 $\mu\text{m}$ ). In one-day-old *let-60(gf<sup>ts</sup>)* mutants incubated for  
445 4 hours at 25°C, the average rachis diameter was decreased by 39%, while the average height  
446 of the cells was increased by 6.6% relative to the wild-type. Conversely, in *mpk-1(ts lf)* mutants  
447 incubated at 25°C for 4 hours the average rachis area was expanded by 21%, while the average  
448 height of the cells was decreased by 8.6%. (**Fig. 5G-I**).

449 Together these results suggest that RAS/MAPK signaling promotes actomyosin constriction at  
450 the apical rachis bridges. In addition, elevated RAS/MAPK signaling results in a decreased  
451 diameter of the central rachis and elongation of the pachytene germ cells along their apicobasal  
452 axis.

Figure 5

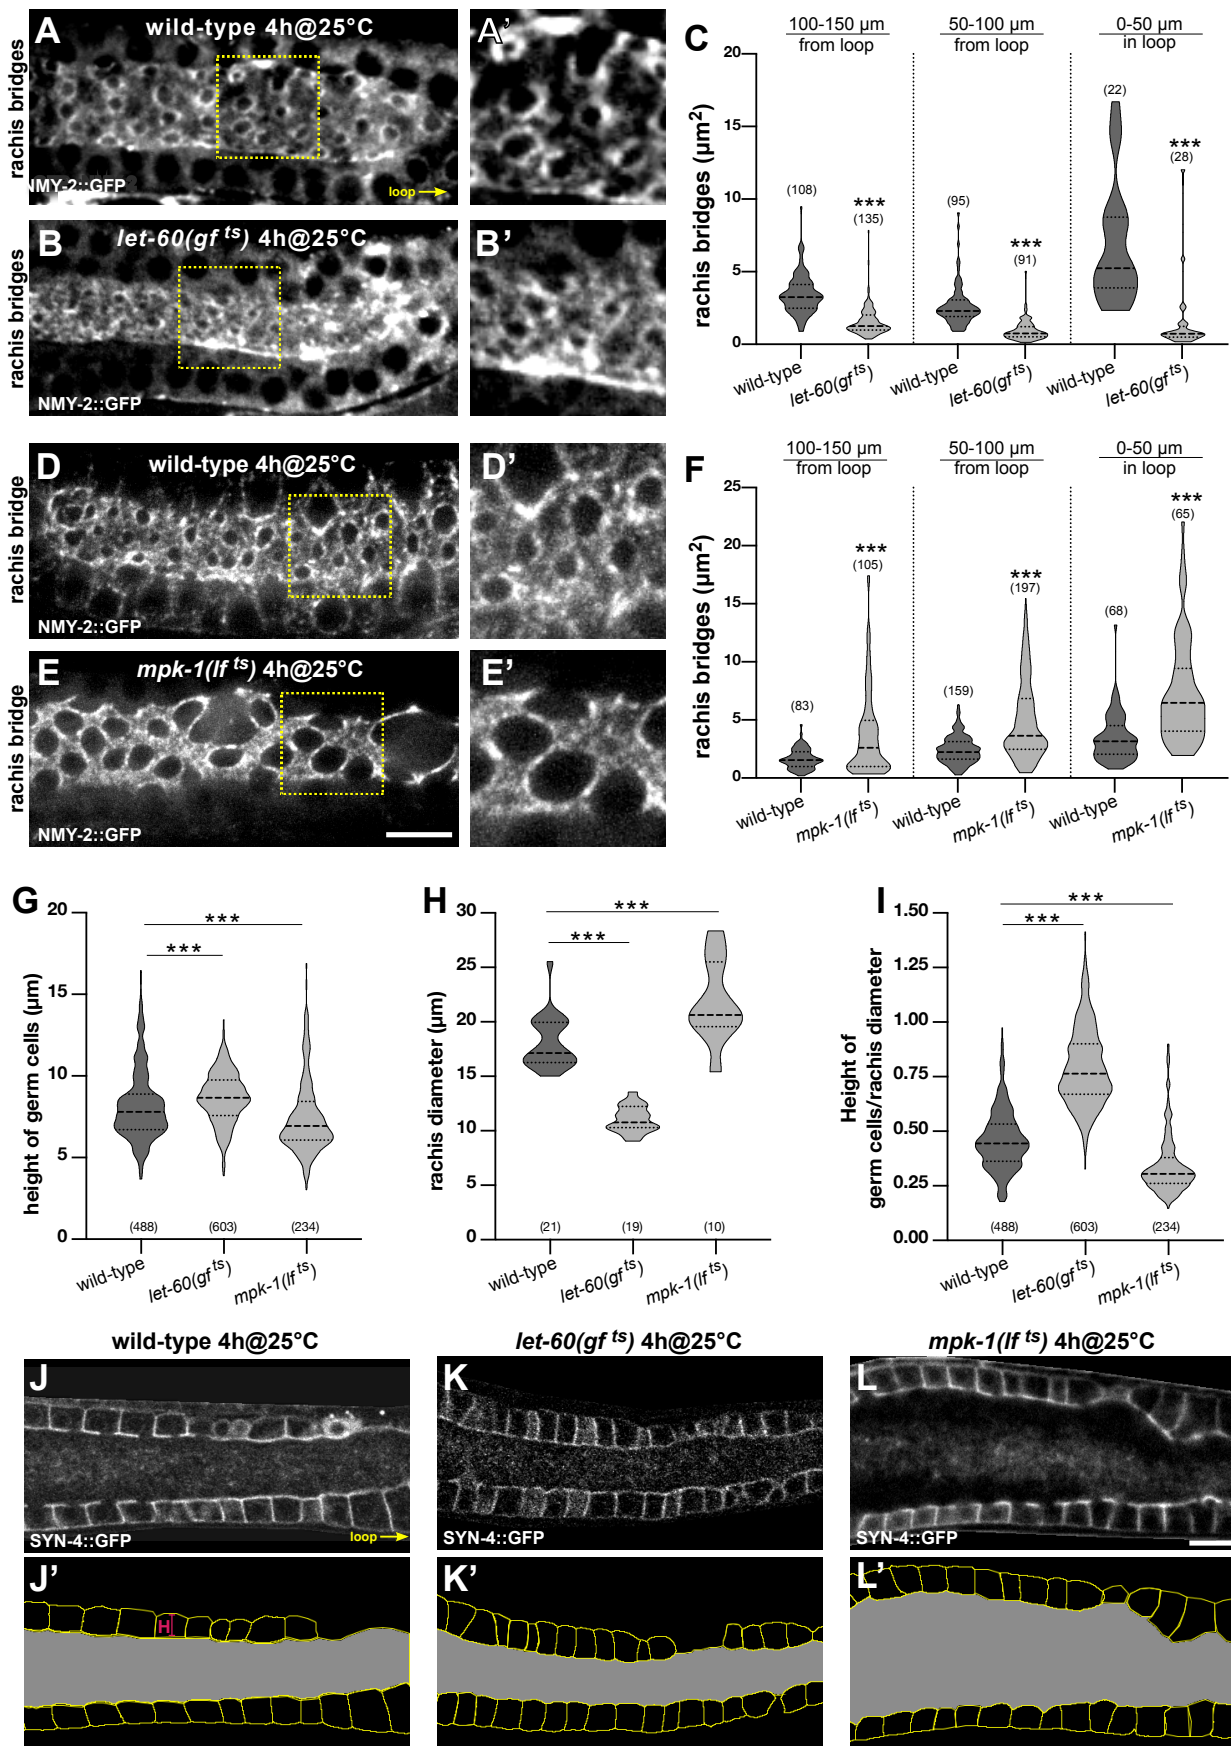

454 **Figure 5. RAS/MAPK signaling promotes apical germ cell constriction**  
455 (A, B) Rachis bridges outlined by the NMY-2::GFP reporter in one-day-old wild-type and *let-*  
456 *60(gf<sup>ts</sup>)* mutant animals grown for 4 hours at the restrictive temperature of 25°C. (A') and (B')  
457 show two-fold magnifications of the regions outlined by the dashed yellow boxes in (A) and  
458 (B). Additional examples of the rachis bridges in wild-type and *let-60(gf<sup>ts</sup>)* mutants are shown  
459 in **suppl. Fig. S5A-B**. (C) Violin plots showing the size of the rachis bridges in wild-type and  
460 *let-60(gf<sup>ts</sup>)* mutant animals in the three indicated gonad regions. Five animals were analyzed  
461 for wild-type and 6 animals for *let-60(gf<sup>ts</sup>)*. (D, E) Rachis bridges in wild-type and *mpk-1(lf<sup>ts</sup>)*  
462 mutant animals grown for 4 hours at the restrictive temperature (4h@25°C) at the L4 stage.  
463 (D') and (E') show two-fold magnifications of the regions outlined by the dashed yellow boxes  
464 in (D) and (E). (F) Violin plots showing the size of the rachis bridges in wild-type and *mpk-*  
465 *1(lf<sup>ts</sup>)* mutant animals in the three indicated gonad regions. Nine animals were analyzed for  
466 wild-type and 8 animals for *mpk-1(gf<sup>ts</sup>)*. The quantification of the rachis bridges after a 6-hour  
467 inactivation of MPK-1 is shown in **suppl. Fig. S5C-E**. (G) Violin plots showing the height of  
468 pachytene germ cells (lateral membranes 50 to 150 μm from the loop) in wild-type, *let-60(gf<sup>ts</sup>)*  
469 *ts*) and *mpk-1(lf<sup>ts</sup>)* mutants, grown at 20°C for 68 hours and incubated for the last 4 hours at  
470 25°C. Twenty-one animals were analyzed for wild-type, 19 for *let-60(gf<sup>ts</sup>)* and 10 for *mpk-1(lf<sup>ts</sup>)*  
471 *ts*). (H) Violin plots show the average diameter of the rachis in the same animals as in (G). (I)  
472 Violin plots showing the ratios of germ cell height to rachis diameter. (J-L) Mid-sagittal  
473 sections of a wild-type, a *let-60(gf<sup>ts</sup>)* and an *mpk-1(lf<sup>ts</sup>)* mutant were used to measure cell height  
474 and rachis diameter shown in (G-I). (J'-L') Masks generated from the animals shown in (J-L)  
475 using the cellpose algorithm [52]. Cell borders are shown in yellow and the rachis area is in  
476 grey. Dashed lines in the violin plots indicate the median values and the dotted lines the upper  
477 and lower quartiles. For the measurements of the rachis bridges and cell heights, the numbers  
478 in brackets refer to the number of cells analyzed, and for the rachis diameter to the number of  
479 animals scored. Statistical analysis was done using one-way ANOVA followed by a Tukey's  
480 test for multiple comparisons or with an unpaired two-tailed t-test (**suppl. Tab. S1**). \*\*  
481 indicates  $p < 0.01$  and \*\*\*  $p < 0.001$  Scale bars are 10 μm.  
482

483 **RAS/MAPK signaling is necessary for NMY-2 myosin enrichment at the rachis bridges**

484 To investigate the interactions between the ECT/RHO/ROCK and RAS/MAPK pathways, we  
485 combined the germline-specific *mpk-1b(lf)* or the temperature-sensitive *mpk-1(lf<sup>ts</sup>)* alleles with  
486 the *ect-2(gf)* mutation and scored germ cell apoptosis using the CED-1::GFP marker. The  
487 germline-specific *mpk-1b(lf)* allele in particular excludes possible interference caused by loss  
488 of the somatic MPK-1A isoform. Animals were scored 24 hours after the L4 stage at 20°C or  
489 for the *mpk-1(lf<sup>ts</sup>)* allele after incubation at 25°C for the final 4 hours. *ect-2(gf); mpk-1b(lf)*  
490 double mutants displayed a strong reduction in CED-1::GFP positive cells compared to *ect-*  
491 *2(gf)* single mutants (**Fig. 6A**, left). Also in *ect-2(gf); mpk-1(lf<sup>ts</sup>)* double mutants, the number  
492 of CED-1::GFP positive cells decreased to the level of *mpk-1(lf<sup>ts</sup>)* single mutants (**Fig. 6A**,  
493 right). Therefore, MPK-1 acts either downstream of ECT-2, or RAS/MAPK signaling  
494 promotes germ cell death in parallel with the ECT/RHO/ROCK pathway through a different  
495 mechanism.

496 To examine if MAPK activity is regulated by the ECT/RHO/ROCK pathway, we quantified  
497 the levels of the activated, di-phosphorylated 50.6 kD MPK-1B isoform (P-MPK-1B) by  
498 Western blot analysis using a di-phospho-specific ERK antibody [47]. Analysis of whole-  
499 animal extracts of 1 day-old adult *ect-2(gf)* and *let-502(lf<sup>ts</sup>)* animals grown for 4 hours at the  
500 restrictive temperature of 25°C revealed no significant changes in P-MPK-1B levels (**Fig. 6B**  
501 and **suppl. Fig. S6A-A''**). Thus, the RAS/MAPK and ECT/RHO/ROCK signaling pathways  
502 likely act through distinct mechanisms to induce apical germ cell constriction and death.

503 To investigate how RAS/MAPK signaling controls germ cell constriction, we examined the  
504 sub-cellular distribution of NMY-2::GFP myosin. In the late pachytene region (50-100µm from  
505 the loop) of one-day-old adult wild-type animals, NMY-2::GFP was enriched in punctate  
506 structures around the rachis bridges (**Fig. 6C**, see **suppl. Fig. S6B** for intensity profiles and  
507 additional examples). In *mpk-1b(lf)* mutants, on the other hand, NMY-2::GFP enrichment at  
508 the rachis bridges was reduced, and the NMY-2::GFP puncta were evenly distributed on the  
509 apical cortex between the rachis bridges (**Fig. 6D** and **suppl. Fig. S6C**). Since the diameter of  
510 the rachis bridges was enlarged in *mpk-1b(lf)* mutants and hence the area of the apical cortex  
511 between the rachis bridges reduced, *mpk-1b(lf)* likely resulted in a higher local NMY-2::GFP  
512 concentration on the apical cortex. Quantification of the average NMY-2::GFP intensities over  
513 the entire apical surface including the rachis bridges indicated that loss of *mpk-1b* did not  
514 significantly alter total NMY-2::GFP levels (**suppl. Fig. S6D, D'**). Reduced NMY-2::GFP

515 localization at the rachis bridges was also observed in *mpk-1(lf<sup>ts</sup>)* mutants, though the effect  
516 was less pronounced due to the partial inactivation of *mpk-1* (**Fig. 5E** and **suppl. Fig. S5D**).  
517 Thus, RAS/MAPK signaling may be necessary to localize NMY-2 to the rachis bridges.  
518 However, it should be noted that the lower levels of NMY-2::GFP at the rachis bridges could  
519 also be an indirect consequence of the changed gonad morphology (i.e. the enlarged rachis  
520 bridges) in *mpk-1(lf)* mutants.

521 To test if the altered distribution of NMY-2 in *mpk-1b(lf)* and *mpk-1(lf<sup>ts</sup>)* mutants changed  
522 actomyosin contractility, we performed laser ablation experiments to measure the cortical  
523 tension, as described [18,53]. Using a pulsed UV-laser, we created point incisions on the apical  
524 membranes between the rachis bridges, followed the expansion of the incisions by tracking the  
525 displacement of individual NMY-2::GFP foci (**Fig. 6E, F** and **suppl. Fig. S6E**), and quantified  
526 the initial recoil velocity and total recoil as indicators of the cortical tension [53] (see also  
527 materials and methods). The initial recoil velocity and the total recoil were both increased in  
528 *mpk-1b(lf)* mutants grown at 20° (**Fig. 6G, H**) and in *mpk-1(lf<sup>ts</sup>)* mutants grown for 4 hours at  
529 25°C (**suppl. Fig. S6F, G**). On the other hand, RNAi of *let-502 rock* resulted in a smaller total  
530 recoil, though the initial recoil velocity was not significantly changed (**Fig. 6F-H**).

531 We conclude that RAS/MAPK signaling is not necessary to induce actomyosin contractility,  
532 but rather to control the sub-cellular distribution of NMY-2 myosin. The increased recoil in  
533 *mpk-1* mutants may be due to the changed NMY-2 localization, resulting in a higher local  
534 concentration of NMY-2 on the apical cortex. Inhibition of *let-502 rock*, on the other hand,  
535 causes a global reduction of actomyosin contractility and a reduced tension on the apical cortex.



Figure 6

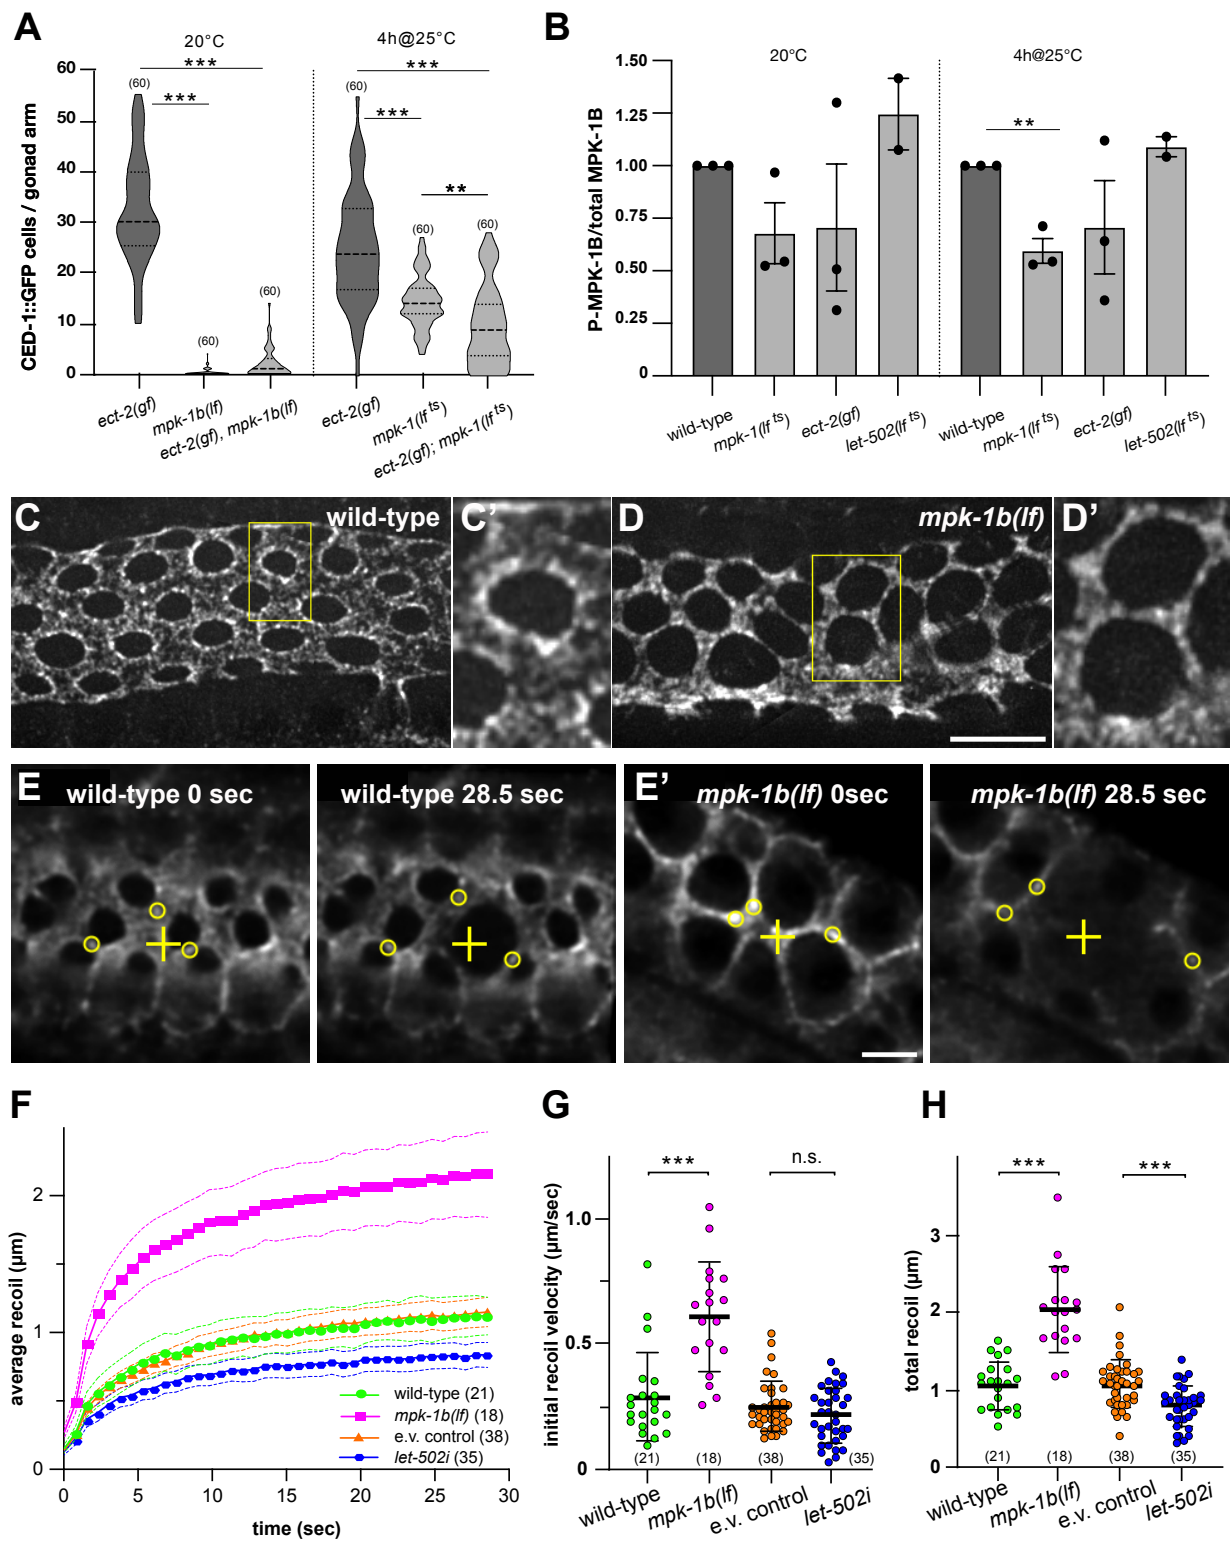

536

537 **Figure 6. RAS/MAPK signaling controls NMY-2 myosin localization at the rachis bridges**

538 (A) Violin plot showing the number of CED-1::GFP positive apoptotic germ cells per gonad

539 arm in one-day-old adults of the indicated genotypes, grown either at 20°C (left) or up-shifted

540 to 25°C for the last 4 hours (right). (B) Quantification of di-phosphorylated MPK-1B (P-MPK-

541 1B) and total MPK-1B protein levels on Western blots of total extracts from one-day-old adults

542 of the indicated genotypes, incubated either at 20°C or for the final 4 hours at 25°C. The  
543 average intensity ratios  $\pm$  SEM of the P-MPK-1B to MPK-1B signals, each normalized to the  
544 tubulin loading controls and relative to the wild-type control values obtained in each  
545 experiment are shown. Quantification of three biological replicates as described in Materials  
546 and Methods, except for two *let-502* replicates. Individual blots are shown in **suppl. Fig. S6A-**  
547 **A''**. (C) NMY-2::GFP localization in wild-type and (D) *mpk-1b(lf)* mutants in the late  
548 pachytene region (50-100 $\mu$ m from the loop) 66 to 68 hours post-L1 arrest. Maximum intensity  
549 projections of deconvolved z-stacks spanning the apical surface are shown. The yellow boxes  
550 outline the regions shown at two-fold magnification in (C') and (D'). NMY-2::GFP intensity  
551 profiles across the rachis bridges and additional examples are shown in **suppl. Fig. S6B, C**.  
552 (E) Recoil after point incision in wild-type and (E') *mpk-1b(lf)* one-day-old adults (66 to 68  
553 hours after L1 arrest). The left frames (0 sec) show the apical surface before and the right  
554 frames 28.5 sec after the incision. The yellow crosses indicate the incision point and the circles  
555 mark NMY-2::GFP foci used to track the mean radial displacement from the incision points.  
556 See **Movies S3 & S4** for all time points of the examples shown, and **suppl. Tab. S1** for the  
557 individual measurements of all animals scored. (F) Mean radial displacement (recoil) plotted  
558 against time after incision. The symbols indicate the average recoil of all animals analyzed and  
559 the dashed lines the 95% CI. (G) Initial recoil velocities and (H) total recoil in the indicated  
560 genotypes/ conditions were calculated for each animal individually. See materials and methods  
561 for details on the curve fitting and quantification. Dashed horizontal lines in the violin plots in  
562 (A) indicate the median values and dotted lines the upper and lower quartiles, solid horizontal  
563 lines in (G) and (H) the mean values  $\pm$  SD. The numbers in brackets refer to the numbers of  
564 animals analyzed. Statistical analysis was done using one-way ANOVA followed by a Tukey's  
565 test for multiple comparisons (A, B) or by unpaired t-tests (G, H) (**suppl. Tab. S1**). \*\* indicates  
566  $p < 0.01$  and \*\*\*  $p < 0.001$ . Scale bars in (D) and (E') are 10 $\mu$ m and 5 $\mu$ m, respectively.

567 **Discussion**

568 Apoptotic cell death is a ubiquitous process that serves to maintain cellular homeostasis in self-  
569 renewing organs [2–4]. We have investigated germ cell apoptosis in *C. elegans*  
570 hermaphrodites, a physiological process that eliminates around 60% of all germ cells during  
571 the pachytene stage of meiotic prophase I. In contrast to the programmed cell death occurring  
572 during embryo and larval development in the *C. elegans* soma, physiological germ cell death  
573 in adult animals appears to be a stochastic process that eliminates randomly selected cells.  
574 Here, we show that pachytene stage germ cells smaller than their neighbors are selectively  
575 eliminated through apoptosis, probably to make space for and donate their resources to the  
576 surviving germ cells entering oogenesis [11,15]. Apical actomyosin constriction at the rachis  
577 bridges that connect the cells to a common cytoplasmic reservoir (the rachis) is jointly  
578 controlled by the RAS/MAPK and ECT/RHO/ROCK signaling pathways. Enhancing apical  
579 germ cell constriction reduces germ cell size and thereby increases the rate of physiological  
580 germ cell death (**Fig. 7**).

581

582 **The RHO/ROCK pathway promotes physiological germ cell death via apical germ cell**  
583 **constriction**

584 Based on our germ cell tracking data, which demonstrate that germ cells reduce their size 1 to  
585 2 hours before forming apoptotic corpses, we investigated the involvement of the RHO/ROCK  
586 pathway in physiological germ cell death. Reducing germ cell size by hyper-activation of the  
587 RHO GEF ECT-2 was sufficient to increase germ cell death at the pachytene stage, whereas  
588 inhibiting the RHO pathway specifically in germ cells caused a reduction in physiological germ  
589 cell death. These data indicated that reduced germ cell size could be a cause and not only a  
590 consequence of germ cell death. To exclude the possibility that the reduction in germ cell death  
591 observed after inhibiting the ECT/RHO/ROCK pathway was an indirect consequence of an  
592 overall loss of cellular integrity, we monitored germ cell shape and chose conditions that only  
593 transiently inhibited the ECT/RHO/ROCK pathway without perturbing gonad architecture.  
594 Under these conditions, we observed a reduction in apoptotic corpse formation while  
595 maintaining germ cell integrity.

596 The changes in germ cell size and death caused by reducing actomyosin contractility are  
597 accompanied by the opening of the rachis bridges. This suggests that germ cell size is regulated  
598 by the constriction of the rachis bridges, which regulate the flow of cytoplasm between the  
599 germ cells and the rachis. Interestingly, the constriction of the rachis bridges and apoptotic

600 corpse formation only occurred in the mid to late pachytene region, before the surviving germ  
601 cells enter the loop region, where they reopen their rachis bridges and grow in size. These  
602 observations suggest that germ cells progressing through the pachytene may receive a  
603 positional signal that induces apical germ cell constriction. Moreover, the constitutive  
604 activation of the ECT/RHO/ROCK pathway through a *gf* mutation in *ect-2* reduced germ cell  
605 size only from the mid to late pachytene region onwards. Thus, apical germ cell constriction in  
606 the pachytene region may depend on additional signals, which may be transduced by the  
607 RAS/MAPK pathway.

608

### 609 **RAS/MAPK signaling induces apical germ cell constriction**

610 The RAS/MAPK pathway regulates oogenesis in various organisms, including *C. elegans*,  
611 *Drosophila* and mammals [46,54–56]. In the *C. elegans* hermaphrodite germline, RAS/MAPK  
612 signaling plays an essential role at two stages, during pachytene progression and oocyte  
613 maturation [57]. The activation of RAS/MAPK signaling by the DAF-2 insulin receptor in  
614 germ cells progressing through the pachytene stage is essential for the germ cells to maintain  
615 the membrane integrity, exit pachytene, and initiate oocyte differentiation [29,47,58].

616 Previous reports have shown that RAS/MAPK signaling at the pachytene stage is required for  
617 physiological as well as DNA damage-induced germ cell death [11,30]. We have confirmed  
618 this for the physiological cell death by inactivation of the germ cell-specific MPK-1b isoform.  
619 Moreover, we show that RAS/MAPK signaling reduces germ cell size by inducing apical  
620 constriction at the rachis bridges together with the ECT/RHO/ROCK pathway discussed above.  
621 The regulation of germ cell size by RAS/MAPK signaling does not require the activation of  
622 the pro-apoptotic CED pathway, indicating that the reduced size of the germ cells in *let-60(gf)*  
623 mutants is not a consequence of enhanced apoptosis.

624 We have previously reported an interaction between the ECT/RHO and the RAS/MAPK  
625 pathways during vulval fate specification in the hermaphrodite larva, where hyper-activation  
626 of RHO-1 signaling through the *ect-2(gf)* mutation promotes 1° fate specification upstream of  
627 or in parallel with MPK-1 signaling [23]. Moreover, activation of the EGFR/RAS/MAPK  
628 pathway in the 1° vulval precursor cells is necessary for their apical constriction, which initiates  
629 the invagination of the vulval epithelium [51].

630 The redistribution of NMY-2 from the rachis bridges to the apical cortex in the germline of  
631 *mpk-1* mutants likely contributes to the expansion of the rachis bridges. Moreover, the  
632 increased recoil after laser incision of the apical germ cell cortex in *mpk-1* mutants suggests

633 that RAS/MAPK signaling is not necessary for actomyosin contractility, but rather for the  
634 localization of myosin at the rachis bridges. The reduced levels of NMY-2 at the rachis bridges  
635 after the inactivation of RAS/MAPK signaling could be an indirect consequence of changes in  
636 gonad architecture that affect the size or integrity of the rachis bridges. Alternatively,  
637 RAS/MAPK signaling may directly regulate myosin mobility or recruitment to the rachis  
638 bridges, for example via phosphorylation of the myosin heavy chain NMY-2, which prevents  
639 the assembly of myosin into filaments [59]. Such a mechanism has recently been discovered  
640 during somatic cell death, where PIG-1 MELK phosphorylates NMY-2 to cause asymmetrical  
641 cell division and apoptosis [60,61].

642 The changes in gonad architecture after hyperactivation or inhibition of the RAS/MAPK  
643 pathway (e.g. the enlarged rachis in *mpk-1(lf)* mutants) cannot intuitively be explained by local  
644 changes in actomyosin contractility alone, suggesting that RAS/MAPK signaling affects gonad  
645 morphology through additional mechanisms. For example, inhibition of RAS/MAPK signaling  
646 may increase the hydrostatic pressure in the gonad due to the lack of oocyte maturation and  
647 ovulation [57] and thereby enlarge the rachis diameter, while elevated RAS/MAPK signaling  
648 may result in a lowered hydrostatic pressure, and consequently a smaller rachis diameter.

649 Taken together, our data suggest that the RAS/MAPK and ECT/RHO/ROCK pathways act  
650 through distinct mechanisms to control germ cell size and death. This model is consistent with  
651 previous reports showing that the size of the rachis bridges decreases in the pachytene region  
652 where the RAS/MAPK pathway is active and again increases in surviving germ cells that enter  
653 the loop region [19]. It should be noted, however, that our data do not exclude the possibility  
654 that RAS/MAPK signaling also regulates germ cell death independently of germ cell size  
655 through an unknown mechanism (dashed arrow in **Fig. 7**).

656

### 657 **A contractility-based model for physiological germ cell death**

658 We propose that actomyosin contractility of the rachis bridges, regulated by the combined  
659 actions of the RAS/MAPK and ECT/RHO/ROCK pathways, enhances the intrinsic disparities  
660 in cell size in the syncytial gonad region. Germ cell tracking experiments revealed that  
661 stochastic, initially small size differences between individual germ cells are rapidly amplified,  
662 as slightly smaller cells progressively shrink, while their neighbors increase in size. This  
663 phenomenon can be explained by the Law of Laplace, which is illustrated by an experiment  
664 with two corresponding balloons of unequal sizes, where the initially smaller balloon empties  
665 into the larger one. Such a model has been proposed by Chartier *et al.* [31], who found that

666 hydraulic instability in the syncytial germline amplifies stochastic size differences between the  
667 germ cells, causing smaller cells to expel their cytoplasm and die. Specifically, the Law of  
668 Laplace ( $T = P * R/2$ , where  $T$  = surface tension;  $P$  = internal pressure,  $R$  = cell radius) predicts  
669 that for a given internal pressure, which should be equal in all syncytial germ cells connected  
670 to the rachis, the surface tension will be lower and therefore actomyosin contractility can be  
671 more effective in smaller cells. Hence, germ cells that are slightly smaller than their neighbors  
672 are prone to shrink and expel their cytoplasm until their rachis bridges are closed. According  
673 to this model, increasing the activity of the RAS/MAPK or ECT/RHO/ROCK pathway will  
674 enhance actomyosin contractility at the rachis bridges, which will exacerbate this inherent  
675 instability and result in even greater cell size discrepancies and an increased rate of germ cell  
676 death.

677 Shrinking germ cells may not only donate their cytoplasm to the survivors but also lose survival  
678 factors that prevent the activation of the CED-3 caspase. Pre-apoptotic germ cells rapidly expel  
679 most of their mitochondria [32], which carry anti-apoptotic factors such as the BCL-2 homolog  
680 CED-9 [62]. However, a *ced-9(gf)* mutation only slightly affects physiological germ cell death,  
681 suggesting that germ cells contain additional anti-apoptotic factors. In mutants blocking  
682 mitochondrial expulsion, the germ cells can still undergo apoptosis [32], suggesting that anti-  
683 apoptotic factors localized in the cytoplasm may be lost in small germ cells.

684 The regulation of physiological germ cell death by cell size probably serves to maintain  
685 germline homeostasis and ensure the reallocation of resources from the dying to the surviving  
686 germ cells that grow in size while initiating oogenesis [13,15]. The coupling of nutrient signals  
687 sensed by the DAF-2 insulin receptor to the RAS/MAPK pathway could be a mechanism that  
688 permits the animals to adapt the equilibrium between oocyte differentiation and germ cell death  
689 to changing environmental conditions [29].

690 Cell shrinkage is a hallmark of cells undergoing apoptosis [36]. In most cases, the size  
691 reduction has been seen as a consequence rather than a cause of apoptotic cell death. Our  
692 findings that actomyosin-induced cell constriction is one factor in selecting smaller germ cells  
693 to undergo apoptosis could point to a more widely used mechanism. Even though the *C.*  
694 *elegans* hermaphrodite gonads with their syncytial architecture in the distal region represent a  
695 special case, it is conceivable that actomyosin-mediated cell shape changes, for example during  
696 asymmetric cell division, could contribute to the elimination of the usually smaller daughter  
697 cells [61,63].

Figure 7

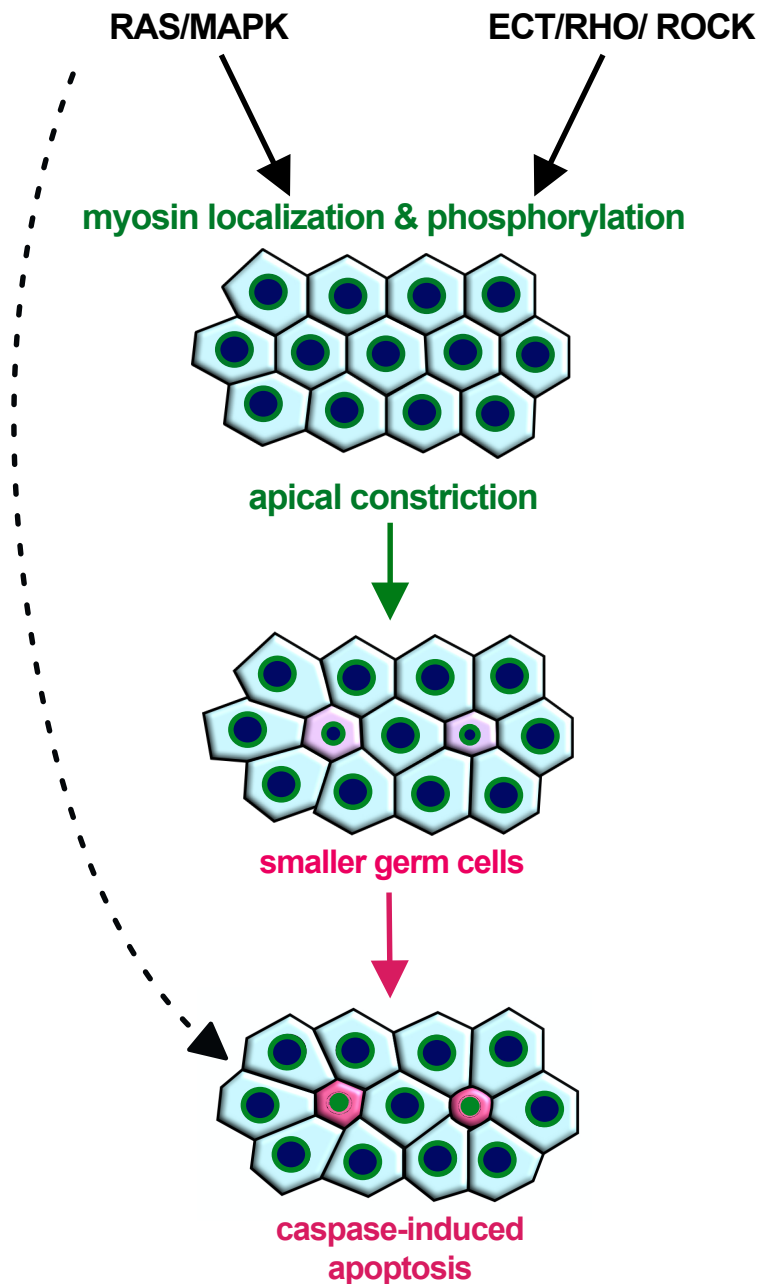

698

699 **Figure. 7 Apical germ cell constriction promotes physiological germ cell death**

700 Activation of RAS/MAPK signaling in germ cells at the pachytene stage is necessary for the  
701 localization of NMY-2 myosin at the rachis bridges, while ECT-2/RHO/ROCK signaling  
702 regulates actomyosin-contraction via phosphorylation of the regulatory myosin light chain  
703 MLC-4. Actomyosin contraction at the rachis bridges controls germ cell size and enhances  
704 stochastic disparities in germ cell sizes (Laplace effect). Smaller germ cells are selectively  
705 eliminated by Caspase-induced apoptosis. In addition, RAS/MAPK signaling may also directly  
706 induce apoptosis through unknown mechanisms (dashed arrow). Rachis bridges are

707 symbolized with green circles, cells that decrease in size are shown in pink and round, and  
708 apoptotic cells in magenta color.



709 **Materials and Methods**

710 ***C. elegans* culture and maintenance**

711 *C. elegans* strains were maintained at 20°C, unless noted otherwise, on standard nematode  
712 growth medium (NGM) agar plates as described [64]. The wild-type N2 strain was *C. elegans*,  
713 variety Bristol. We refer to translational protein fusions with a :: symbol between the gene and  
714 the tag used, and to transcriptional fusion with a > between the enhancer/promoter used and  
715 the gene of interest. Details on the construction of the plasmid vectors can be found in **suppl.**  
716 **Tab. S2**. The genotypes of the strains, the plasmid vectors, oligonucleotides, and sgRNAs used  
717 in this study are listed in **suppl. Tab. S3**.

718

719 **Generation of alleles by CRISPR/CAS9 genome editing**

720 The endogenous *ect-2(zh135)* and *let-502(zh139)* *gfp* insertions were generated using the  
721 modified CRISPR/CAS9 protocol described by [65]. The GFP tag was inserted at the C-  
722 terminus of *ect-2* and the N-terminus of *let-502*. The *mpk-1b(zh164)* allele introducing a stop  
723 codon at position 4 was generated by the co-CRISPR protocol described in [1].

724

725 **Generation of extrachromosomal arrays by microinjection**

726 Microinjection for the generation of the extrachromosomal line (*mpk-1(ga111<sup>ts</sup>) unc-79(e1068)*  
727 *III; bcls39[Plim-7::ced-1::gfp]; zhEx676[mpk-1A(+)] V*) was performed as described in [66]  
728 using purified PCR DNA at a concentration of 35 ng/μl and the co-injection marker pCFJ90  
729 (*P<sub>myo-2</sub>>mCherry*) at a concentration of 2.5 ng/μl [67]. pBluescript-KS was added to achieve  
730 the final DNA concentration of 150 ng/μl in a total volume of 20μl. Primary transformants  
731 were identified by the mCherry signal from the pharynx.

732

733 **RNA interference**

734 RNAi interference was done by feeding dsRNA-producing *E. coli* [68]. dsRNA-producing  
735 bacterial clones targeting genes of interest were obtained from the *C. elegans* genome-wide  
736 RNAi library or the *C. elegans* open reading frame (ORFeome) RNAi library (both from  
737 Source BioScience). Bacteria were grown in 2mL of 2xTY medium, containing 200μg/mL  
738 ampicillin and 25μg/mL tetracycline at 37°C and either directly seeded on NGM plates  
739 containing 3mM IPTG or diluted into fresh 2xTY medium containing 200μg/mL ampicillin  
740 and 25μg/mL tetracycline and 1mM IPTG and grown for 4 hours at 37°C before seeding [69].  
741 For constitutive RNAi, larvae were synchronized at the L1 stage by hypochlorite treatment of

742 gravid adults and plated on NGM plates containing dsRNA-expressing bacteria. P0 animals  
743 were analyzed after 72 to 74 hours of treatment (one-day-old adults). For transient RNAi,  
744 synchronized L1 larvae were grown for 48 hours on OP50 bacteria and transferred as L4 larvae  
745 to the RNAi plates for 24 hours.

746

#### 747 **Microscopy**

748 Fluorescent and DIC (Nomarski) images were acquired on an Olympus BX61 microscope  
749 equipped with an X-light V2 spinning disk confocal system (50µm pinhole diameter),  
750 Prizmatix UHP-T-460-DI/UHP-T-560-DI LEDs as light source, an Andor iXon Ultra 888  
751 EMCCD camera and a 60x or 100x Plan Apo lens (N.A. 1.3 and 1.4, respectively) or on a Leica  
752 DMRA microscope equipped with a Lumencor Spectra light engine, two Hamamatsu C11400-  
753 42U30 camera, a beam splitter and a 63x Plan Apo lens (N.A. 1.3). Long-term time-lapse  
754 recordings were acquired on a Nikon Ti-U microscope equipped with an Omicron LedHUB as  
755 a light source, a Photometrics Prime 95B camera and a PLAN Apo Lambda 60x oil immersion  
756 objective. z-stacks were recorded with a spacing of 0.1 to 0.5 µm depending on the  
757 magnification used. For germ-cell tracking experiments, one-day-old adult hermaphrodites  
758 were immobilized in custom-made microfluidic devices as described [12], and 41 z-slices were  
759 recorded every 7.5 minutes over 12 hours. See the **extended methods** section for a detailed  
760 description of the image processing workflow.

761

#### 762 **Scoring the apoptotic cell numbers**

763 Cell corpses were counted using strains containing the *bcIs39[Plim-7::ced-1::gfp]* reporter by  
764 observing CED-1::GFP expression to identify corpses engulfed by the somatic sheath cells  
765 [14,37]. Corpses were counted in one-day-old adults 72h after L1 synchronization at 20°C or,  
766 where indicated, worms were incubated for 68h at 20°C and shifted to 25°C for 4 hours or 24  
767 hours before quantification.

768

#### 769 **Quantification of ERK phosphorylation by Western Blot analysis**

770 One-hundred one-day-old adult animals, grown from the L1 stage for 72 hours at 20°C or  
771 incubated for the last 4 or 24 hours at 25°C where indicated, were washed 3 times in ice-cold  
772 M9, collected by centrifugation and lysed in 50 µl 1xSDS samples buffer for 5 minutes at 95°C.  
773 To remove genomic DNA, 1µl of RNase-Free DNase (QIAGEN) was added and the samples  
774 were incubated at room temperature for 10 minutes, and again for 5 minutes at 95°C

775 immediately before loading. 20  $\mu$ l extract each were loaded on two 4-12% gradient  
776 polyacrylamide gels (Invitrogen) run in parallel. Western blots were incubated with anti-di-  
777 phospho or total MAP Kinase antibodies as well as anti-alpha Tubulin antibodies as loading  
778 controls. Bound primary antibodies were detected with HRP-conjugated secondary antibodies  
779 followed by a chemiluminescence assay (SuperSignal™ West Dura Extended Duration  
780 Substrate, Thermo Scientific). To inactivate HRP-conjugates and proceed with the incubation  
781 of the primary anti-alpha tubulin antibody, the Western blots were incubated in sodium azide  
782 for 1 hour. Bound primary antibodies were detected with HRP-conjugated secondary antibody  
783 and chemiluminescence assay (SuperSignal™ West Pico PLUS Chemiluminescent Substrate,  
784 Thermo Scientific). Total and di-phospho MPK-1B and alpha-tubulin levels were quantified  
785 by measuring the corresponding band intensities using built-in measurement tools of Fiji [70].  
786 Di-phosphorylated MPK-1B and total MPK-1B intensities were normalized to the alpha-  
787 tubulin signals as loading controls before the di-phospho to total MPK-1B ratios were  
788 calculated. The ratios shown in the graph **Fig. 6C'** are the average values of three biological  
789 replicates (two for *let-502(lf)*), normalized in each experiment to the ratios measured for the  
790 wild-type controls. Antibodies used: anti-diphosphoERK, activated (Sigma-Aldrich, M8159);  
791 anti-MAP Kinase (Sigma-Aldrich, M5670), anti-alpha tubulin (Abcam, ab18251), anti-alpha  
792 Tubulin (Sigma-Aldrich, T6074), HRP anti-Rabbit (Jackson Immuno Research, 111-035-144)  
793 and HRP anti-Mouse (Jackson Immuno Research, 115-035-146).

794

### 795 **Laser incision and recoil measurements**

796 Laser incisions were generated using an Olympus IXplore SpinSR10 microscope equipped  
797 with a 355 nm pulsed laser for photomanipulation (UGA-42 Caliburn, Rapp Optoelectronics),  
798 a z-drift compensator (IX3-ZDC2, Olympus) and a Hamamatsu ORCA-Fusion sCMOS  
799 camera, using a 60x Plan UPlan Apo Silicone oil immersion lens (N.A. 1.3). Incisions were  
800 made with 1000 msec laser pulses at 8-10% laser power. Animals mounted on agarose pads  
801 were observed for 2 frames before and 60 frames after the incision at a rate of 1.33 frames per  
802 sec. For quantification, three to four bright NMY-2::GFP foci around the incision point were  
803 manually tracked over 40 frames using Fiji software [70] to measure their relative displacement  
804 from the point of incision, from which the average radial displacement (recoil) for each animal  
805 and time point was calculated (**suppl. Tab. S1**). Curve-fitting was done individually for each  
806 animal recorded using the equation:

807 
$$recoil(t) = initial\ recoil\ velocity/k * (1 - e^{-k*t})$$

808 to estimate the initial recoil velocity ( $= \partial \text{recoil}(0)/\partial t$ ) and the total recoil ( $\text{recoil}(\infty) = \text{initial}$   
809 recoil velocity/ $k$ , where  $k = \text{Elasticity of the tissue/viscosity coefficient of the drag in the}$   
810 cytoplasm) using Graph Pad Prism software as described [53]. Since we quantified the radial  
811 displacement rather than the change in diameter of the opening, the values obtained are  
812 approximately half of those reported by [18].

813

#### 814 **Statistical analysis**

815 GraphPad Prism 9.0 was used to perform statistical tests and results are shown in **suppl. Tab.**  
816 **S1**. We used two-tailed unpaired t-tests when comparing two samples or ANOVA with Tukey's  
817 correction for multiple comparisons when comparing more than two samples to calculate the  
818 p-values. Samples sizes (numbers of animals or cells analyzed) are indicated in the figure  
819 legends for each experiment. All the experiments were repeated with at least 3 independent  
820 biological replicates, except for **Fig. 3I** (left), **Fig. 4A** and **Fig.4B** (*mpk-1b(zh164)*) with 2  
821 biological replicates).

822

#### 823 **Author contributions**

824 Conceptualization: T.K. and A.H.; Investigation: T.K., S.B., A.C.L. and A.H.; Formal  
825 Analysis: T.K., S.B. and T.A.; Writing - Original Draft: T.K. and A.H.; Writing - Review &  
826 Editing: T.K., S.B., T.A., A.C.L., A.dM. and A.H.; Funding acquisition: T.K., A.dM. and A.H.

827

#### 828 **Acknowledgments**

829 We thank all present and past members of the Hajnal group for critical discussion and  
830 comments, Michael Daube for lab assistance, and Michael Walser for help with the  
831 illustrations. We thank Anne-Lise Routier-Kierzkowska and Richard Smith for their help with  
832 using MorphographX software. We are also grateful to Barbara Conradt for sharing the  
833 MD4476 strain and helpful comments and Andrew Fire for vectors and J. Ahringer for RNAi  
834 clones and WormBase. We thank the team of the Center for Microscopy and Image Analysis,  
835 University of Zurich, for their assistance with performing the laser cutting experiments. Some  
836 strains were provided by the CGC, which is funded by the NIH Office of Research  
837 Infrastructure Programs (P40 OD010440). This project was supported by the Kanton Zürich,  
838 the ETH Zürich, grant no. FK-20-090 from the Forschungskredit of the University of Zürich  
839 to T.K. and by the Swiss National Science Foundation grant no. 31003A- 166580 to A.H.

840

841 **Competing interests**

842 The authors declare that no competing interests exist.

843 **References**

- 844 1. Arya R, White K. Cell death in development: signaling pathways and core mechanisms.  
845 *Semin Cell Dev Biol.* 2015;39: 12–19. doi:10.1016/j.semcdb.2015.02.001
- 846 2. Vaux DL, Korsmeyer SJ. Cell Death in Development. *Cell.* 1999;96: 245–254.  
847 doi:10.1016/S0092-8674(00)80564-4
- 848 3. Jacobson MD, Weil M, Raff MC. Programmed cell death in animal development. *Cell.*  
849 1997;88: 347–354. doi:10.1016/s0092-8674(00)81873-5
- 850 4. Fuchs Y, Steller H. Programmed cell death in animal development and disease. *Cell.*  
851 2011;147: 742–758. doi:10.1016/j.cell.2011.10.033
- 852 5. Horvitz HR. Genetic control of programmed cell death in the nematode *Caenorhabditis*  
853 *elegans*. *Cancer Res.* 1999;59: 1701s–1706s.
- 854 6. Sulston JE, Horvitz HR. Post-embryonic cell lineages of the nematode, *Caenorhabditis*  
855 *elegans*. *Dev Biol.* 1977;56: 110–156.
- 856 7. Lettre G, Hengartner MO. Developmental apoptosis in *C. elegans*: a complex CEDnario.  
857 *Nat Rev Mol Cell Biol.* 2006;7: 97–108. doi:10.1038/nrm1836
- 858 8. Conradt B, Wu Y-C, Xue D. Programmed Cell Death During *Caenorhabditis elegans*  
859 Development. *Genetics.* 2016;203: 1533–1562. doi:10.1534/genetics.115.186247
- 860 9. Conradt B, Xue D. Programmed cell death. *WormBook Online Rev C Elegans Biol.* 2005;  
861 1–13. doi:10.1895/wormbook.1.32.1
- 862 10. Sulston JE, Schierenberg E, White JG, Thomson JN. The embryonic cell lineage of the  
863 nematode *Caenorhabditis elegans*. *Dev Biol.* 1983;100: 64–119.
- 864 11. Gumienny TL, Lambie E, Hartwig E, Horvitz HR, Hengartner MO. Genetic control of  
865 programmed cell death in the *Caenorhabditis elegans* hermaphrodite germline. *Dev Camb*  
866 *Engl.* 1999;126: 1011–1022.
- 867 12. Berger S, Lattmann E, Aegerter-Wilmsen T, Hengartner M, Hajnal A, deMello A, et al.  
868 Long-term *C. elegans* immobilization enables high-resolution developmental studies in vivo.  
869 *Lab Chip.* 2018;18: 1359–1368. doi:10.1039/c7lc01185g
- 870 13. Gartner A, Boag PR, Blackwell TK. Germline survival and apoptosis. *WormBook Online*  
871 *Rev C Elegans Biol.* 2008; 1–20.
- 872 14. Zhou Z, Hartwig E, Horvitz HR. CED-1 Is a Transmembrane Receptor that Mediates Cell  
873 Corpse Engulfment in *C. elegans*. *Cell.* 2001;104: 43–56. doi:10.1016/S0092-8674(01)00190-  
874 8
- 875 15. Wolke U, Jezuit EA, Priess JR. Actin-dependent cytoplasmic streaming in *C. elegans*  
876 oogenesis. *Dev Camb Engl.* 2007;134: 2227–2236. doi:10.1242/dev.004952
- 877 16. Hirsh D, Oppenheim D, Klass M. Development of the reproductive system of  
878 *Caenorhabditis elegans*. *Dev Biol.* 1976;49: 200–219. doi:10.1016/0012-1606(76)90267-0
- 879 17. Kimble J. Germline proliferation and its control. *WormBook Online Rev C Elegans Biol.*  
880 2005; 1–14. doi:10.1895/wormbook.1.13.1
- 881 18. Priti A, Ong HT, Toyama Y, Padmanabhan A, Dasgupta S, Krajnc M, et al. Syncytial  
882 germline architecture is actively maintained by contraction of an internal actomyosin corset.  
883 *Nat Commun.* 2018;9: 4694. doi:10.1038/s41467-018-07149-2

- 884 19. Rehai-Bell K, Love A, Werner ME, MacLeod I, Yates JR, Maddox AS. A Sterile 20-  
885 family kinase and its co-factor CCM-3 regulate contractile ring proteins on germline  
886 intercellular bridges. *Curr Biol CB*. 2017;27: 860–867. doi:10.1016/j.cub.2017.01.058
- 887 20. Burridge K, Wennerberg K. Rho and Rac Take Center Stage. *Cell*. 2004;116: 167–179.  
888 doi:10.1016/S0092-8674(04)00003-0
- 889 21. Schwartz M. Rho signalling at a glance. *J Cell Sci*. 2004;117: 5457–5458.  
890 doi:10.1242/jcs.01582
- 891 22. Saadeldin IM, Tukur HA, Aljumaah RS, Sindi RA. Rocking the Boat: The Decisive Roles  
892 of Rho Kinases During Oocyte, Blastocyst, and Stem Cell Development. *Front Cell Dev Biol*.  
893 2021;8: 616762. doi:10.3389/fcell.2020.616762
- 894 23. Canevascini S, Marti M, Fröhli E, Hajnal A. The *Caenorhabditis elegans* homologue of  
895 the proto-oncogene *ect-2* positively regulates RAS signalling during vulval development.  
896 *EMBO Rep*. 2005;6: 1169–1175. doi:10.1038/sj.embor.7400574
- 897 24. Wissmann A, Ingles J, McGhee JD, Mains PE. *Caenorhabditis elegans* LET-502 is related  
898 to Rho-binding kinases and human myotonic dystrophy kinase and interacts genetically with a  
899 homolog of the regulatory subunit of smooth muscle myosin phosphatase to affect cell shape.  
900 *Genes Dev*. 1997;11: 409–422. doi:10.1101/gad.11.4.409
- 901 25. Piekny AJ, Mains PE. Rho-binding kinase (LET-502) and myosin phosphatase (MEL-11)  
902 regulate cytokinesis in the early *Caenorhabditis elegans* embryo. *J Cell Sci*. 2002;115: 2271–  
903 2282.
- 904 26. Gally C, Wissler F, Zahreddine H, Quintin S, Landmann F, Labouesse M. Myosin II  
905 regulation during *C. elegans* embryonic elongation: LET-502/ROCK, MRCK-1 and PAK-1,  
906 three kinases with different roles. 2009;136: 3109–3119. doi:10.1242/dev.039412
- 907 27. Martin E, Harel S, Nkengfac B, Hamiche K, Neault M, Jenna S. *pix-1* Controls Early  
908 Elongation in Parallel with *mel-11* and *let-502* in *Caenorhabditis elegans*. *PLoS ONE*. 2014;9:  
909 e94684. doi:10.1371/journal.pone.0094684
- 910 28. Drewnik ED, Wiesenfahrt T, Smit RB, Park Y-J, Pallotto LM, Mains PE. Tissue-specific  
911 regulation of epidermal contraction during *Caenorhabditis elegans* embryonic morphogenesis.  
912 *G3 GenesGenomesGenetics*. 2021;11: jkab164. doi:10.1093/g3journal/jkab164
- 913 29. Lopez AL, Chen J, Joo H-J, Drake M, Shidate M, Kseib C, et al. DAF-2 and ERK couple  
914 nutrient availability to meiotic progression during *Caenorhabditis elegans* oogenesis. *Dev Cell*.  
915 2013;27: 227–240.
- 916 30. Rutkowski R, Dickinson R, Stewart G, Craig A, Schimpl M, Keyse SM, et al. Regulation  
917 of *Caenorhabditis elegans* p53/CEP-1-dependent germ cell apoptosis by Ras/MAPK signaling.  
918 Engebrecht J, editor. *PLoS Genet*. 2011;7: e1002238. doi:10.1371/journal.pgen.1002238
- 919 31. Chartier NT, Mukherjee A, Pfanzelter J, Fürthauer S, Larson BT, Fritsch AW, et al. A  
920 hydraulic instability drives the cell death decision in the nematode germline. *Nat Phys*.  
921 2021;17: 920–925. doi:10.1038/s41567-021-01235-x
- 922 32. Raiders SA, Eastwood MD, Bacher M, Priess JR. Binucleate germ cells in *Caenorhabditis*  
923 *elegans* are removed by physiological apoptosis. *PLoS Genet*. 2018;14: e1007417.  
924 doi:10.1371/journal.pgen.1007417

- 925 33. Barbier de Reuille P, Routier-Kierzkowska A-L, Kierzkowski D, Bassel GW, Schüpbach  
926 T, Tauriello G, et al. MorphoGraphX: A platform for quantifying morphogenesis in 4D. *eLife*.  
927 2015;4: 05864. doi:10.7554/eLife.05864
- 928 34. Dickinson DJ, Ward JD, Reiner DJ, Goldstein B. Engineering the *Caenorhabditis elegans*  
929 genome using Cas9-triggered homologous recombination. *Nat Methods*. 2013;10: 1028–1034.  
930 doi:10.1038/nmeth.2641
- 931 35. Ellis HM, Horvitz HR. Genetic control of programmed cell death in the nematode *C.*  
932 *elegans*. *Cell*. 1986;44: 817–829. doi:10.1016/0092-8674(86)90004-8
- 933 36. Kerr JFR, Wyllie AH, Currie AR. Apoptosis: A Basic Biological Phenomenon with Wide-  
934 ranging Implications in Tissue Kinetics. *Br J Cancer*. 1972;26: 239–257.
- 935 37. Lu N, Yu X, He X, Zhou Z. Detecting Apoptotic Cells and Monitoring Their Clearance in  
936 the Nematode *Caenorhabditis elegans*. *Methods Mol Biol Clifton NJ*. 2009;559: 357–370.  
937 doi:10.1007/978-1-60327-017-5\_25
- 938 38. Yu X, Lu N, Zhou Z. Phagocytic Receptor CED-1 Initiates a Signaling Pathway for  
939 Degrading Engulfed Apoptotic Cells. *PLoS Biol*. 2008;6: e61.  
940 doi:10.1371/journal.pbio.0060061
- 941 39. Derry WB, Putzke AP, Rothman JH. *Caenorhabditis elegans* p53: Role in Apoptosis,  
942 Meiosis, and Stress Resistance. *Science*. 2001;294: 591–595. doi:10.1126/science.1065486
- 943 40. Nadarajan S, Mohideen F, Tzur YB, Ferrandiz N, Crawley O, Montoya A, et al. The MAP  
944 kinase pathway coordinates crossover designation with disassembly of synaptonemal complex  
945 proteins during meiosis. *eLife*. 2016;5: e12039. doi:10.7554/eLife.12039
- 946 41. Bhalla N, Dernburg AF. A conserved checkpoint monitors meiotic chromosome synapsis  
947 in *Caenorhabditis elegans*. *Sci N Y NY*. 2005;310: 1683–1686. doi:10.1126/science.1117468
- 948 42. Zou L, Wu D, Zang X, Wang Z, Wu Z, Chen D. Construction of a germline-specific RNAi  
949 tool in *C. elegans*. *Sci Rep*. 2019;9: 2354. doi:10.1038/s41598-019-38950-8
- 950 43. Liu J, Maduzia LL, Shirayama M, Mello CC. NMY-2 maintains cellular asymmetry and  
951 cell boundaries, and promotes a SRC-dependent asymmetric cell division. *Dev Biol*. 2010;339:  
952 366–373. doi:10.1016/j.ydbio.2009.12.041
- 953 44. Kritikou EA, Milstein S, Vidalain P-O, Lettre G, Bogan E, Doukoumetzidis K, et al. *C.*  
954 *elegans* GLA-3 is a novel component of the MAP kinase MPK-1 signaling pathway required  
955 for germ cell survival. *Genes Dev*. 2006;20: 2279–2292. doi:10.1101/gad.384506
- 956 45. Lee M-H, Hook B, Pan G, Kershner AM, Merritt C, Seydoux G, et al. Conserved  
957 regulation of MAP kinase expression by PUF RNA-binding proteins. *PLoS Genet*. 2007;3:  
958 e233. doi:10.1371/journal.pgen.0030233
- 959 46. Church DL, Guan KL, Lambie EJ. Three genes of the MAP kinase cascade, *mek-2*, *mpk-*  
960 *1/sur-1* and *let-60 ras*, are required for meiotic cell cycle progression in *Caenorhabditis elegans*.  
961 1995;121: 2525–2535.
- 962 47. Lee M-H, Ohmachi M, Arur S, Nayak S, Francis R, Church D, et al. Multiple functions  
963 and dynamic activation of MPK-1 extracellular signal-regulated kinase signaling in  
964 *Caenorhabditis elegans* germline development. *Genetics*. 2007;177: 2039–2062.
- 965 48. Das D, Chen S-Y, Arur S. ERK phosphorylates chromosomal axis component HORMA  
966 domain protein HTP-1 to regulate oocyte numbers. *Sci Adv*. 2020;6: eabc5580.  
967 doi:10.1126/sciadv.abc5580



- 968 49. Lackner MR, Kim SK. Genetic analysis of the *Caenorhabditis elegans* MAP kinase gene  
969 mpk-1. *Genetics*. 1998;150: 103–117.
- 970 50. Eisenmann DM, Kim SK. Mechanism of activation of the *Caenorhabditis elegans* ras  
971 homologue let-60 by a novel, temperature-sensitive, gain-of-function mutation. *Genetics*.  
972 1997;146: 553–565.
- 973 51. Yang Q, Roiz D, Mereu L, Daube M, Hajnal A. The Invading Anchor Cell Induces Lateral  
974 Membrane Constriction during Vulval Lumen Morphogenesis in *C. elegans*. *Dev Cell*.  
975 2017;42: 271–285.e3. doi:10.1016/j.devcel.2017.07.008
- 976 52. Stringer C, Wang T, Michaelos M, Pachitariu M. Cellpose: a generalist algorithm for  
977 cellular segmentation. *Nat Methods*. 2021;18: 100–106. doi:10.1038/s41592-020-01018-x
- 978 53. Liang X, Michael M, Gomez G. Measurement of Mechanical Tension at cell-cell junctions  
979 using two-photon laser ablation. *BIO-Protoc*. 2016;6. doi:10.21769/BioProtoc.2068
- 980 54. Verlhac M-H, de Pennart H, Maro B, Cobb MH, Clarke HJ. MAP Kinase Becomes Stably  
981 Activated at Metaphase and Is Associated with Microtubule-Organizing Centers during  
982 Meiotic Maturation of Mouse Oocytes. *Dev Biol*. 1993;158: 330–340.  
983 doi:10.1006/dbio.1993.1192
- 984 55. Ivanovska I, Lee E, Kwan KM, Fenger DD, Orr-Weaver TL. The *Drosophila* MOS  
985 Ortholog Is Not Essential for Meiosis. *Curr Biol*. 2004;14: 75–80.  
986 doi:10.1016/j.cub.2003.12.031
- 987 56. Fan H-Y, Sun Q-Y. Involvement of mitogen-activated protein kinase cascade during  
988 oocyte maturation and fertilization in mammals. *Biol Reprod*. 2004;70: 535–547.  
989 doi:10.1095/biolreprod.103.022830
- 990 57. Miller MA, Nguyen VQ, Lee M-H, Kosinski M, Schedl T, Caprioli RM, et al. A Sperm  
991 Cytoskeletal Protein That Signals Oocyte Meiotic Maturation and Ovulation. *Science*.  
992 2001;291: 2144–2147. doi:10.1126/science.1057586
- 993 58. Arur S, Ohmachi M, Berkseth M, Nayak S, Hansen D, Zarkower D, et al. MPK-1 ERK  
994 controls membrane organization in *C. elegans* oogenesis via a sex determination module. *Dev*  
995 *Cell*. 2011;20: 677–688. doi:10.1016/j.devcel.2011.04.009
- 996 59. Vicente-Manzanares M, Ma X, Adelstein RS, Horwitz AR. Cytoskeletal motors: Non-  
997 muscle myosin II takes centre stage in cell adhesion and migration. 2009; 1–13.  
998 doi:10.1038/nrm2786
- 999 60. Offenburger S-L, Bensaddek D, Murillo AB, Lamond AI, Gartner A. Comparative genetic,  
1000 proteomic and phosphoproteomic analysis of *C. elegans* embryos with a focus on ham-1/STOX  
1001 and pig-1/MELK in dopaminergic neuron development. *Sci Rep*. 2017;7: 4314.  
1002 doi:10.1038/s41598-017-04375-4
- 1003 61. Wei H, Lambie EJ, Osório DS, Carvalho AX, Conradt B. PIG-1 MELK-dependent  
1004 phosphorylation of nonmuscle myosin II promotes apoptosis through CES-1 Snail partitioning.  
1005 *PLoS Genet*. 2020;16: e1008912. doi:10.1371/journal.pgen.1008912
- 1006 62. Pourkarimi E, Greiss S, Gartner A. Evidence that CED-9/Bcl2 and CED-4/Apaf-1  
1007 localization is not consistent with the current model for *C. elegans* apoptosis induction. *Cell*  
1008 *Death Differ*. 2011;19: 406–415. doi:10.1038/cdd.2011.104

- 1009 63. Ou G, Stuurman N, D'Ambrosio M, Vale RD. Polarized Myosin Produces Unequal-Size  
1010 Daughters During Asymmetric Cell Division. *Science*. 2010;330: 677–680.  
1011 doi:10.1126/science.1196112
- 1012 64. Brenner S. The genetics of *Caenorhabditis elegans*. *Genetics*. 1974;77: 71–94.
- 1013 65. Dickinson DJ, Goldstein B. CRISPR-Based Methods for *Caenorhabditis elegans* Genome  
1014 Engineering. *Genetics*. 2016;202: 885–901. doi:10.1534/genetics.115.182162
- 1015 66. Mello CC, Kramer JM, Stinchcomb D, Ambros V. Efficient gene transfer in *C.elegans*:  
1016 extrachromosomal maintenance and integration of transforming sequences. *EMBO J*. 1991;10:  
1017 3959–3970.
- 1018 67. Frøkjær-Jensen C, Davis MW, Ailion M, Jorgensen EM. Improved Mos1-mediated  
1019 transgenesis in *C. elegans*. *Nat Methods*. 2012;9: 117–118. doi:10.1038/nmeth.1865
- 1020 68. Kamath R. Genome-wide RNAi screening in *Caenorhabditis elegans*. *Methods*. 2003;30:  
1021 313–321. doi:10.1016/S1046-2023(03)00050-1
- 1022 69. Xiao R, Chun L, Ronan EA, Friedman DI, Liu J, Xu XZS. RNAi Interrogation of Dietary  
1023 Modulation of Development, Metabolism, Behavior, and Aging in *C. elegans*. *Cell Rep*.  
1024 2015;11: 1123–1133. doi:10.1016/j.celrep.2015.04.024
- 1025 70. Schindelin J, Arganda-Carreras I, Frise E, Kaynig V, Longair M, Pietzsch T, et al. Fiji: an  
1026 open-source platform for biological-image analysis. *Nat Methods*. 2012;9: 676–682.  
1027 doi:10.1038/nmeth.2019
- 1028

1029 **Supplementary information**

1030

1031 **Table of contents:**

1032 1) Supplementary Figures S1-S5

1033 2) Supplementary Movies S1 & S2

1034 3) Extended methods

1035 4) Supplementary Tables S1 – S3

1036 **Supplementary figures**

**Figure S1**

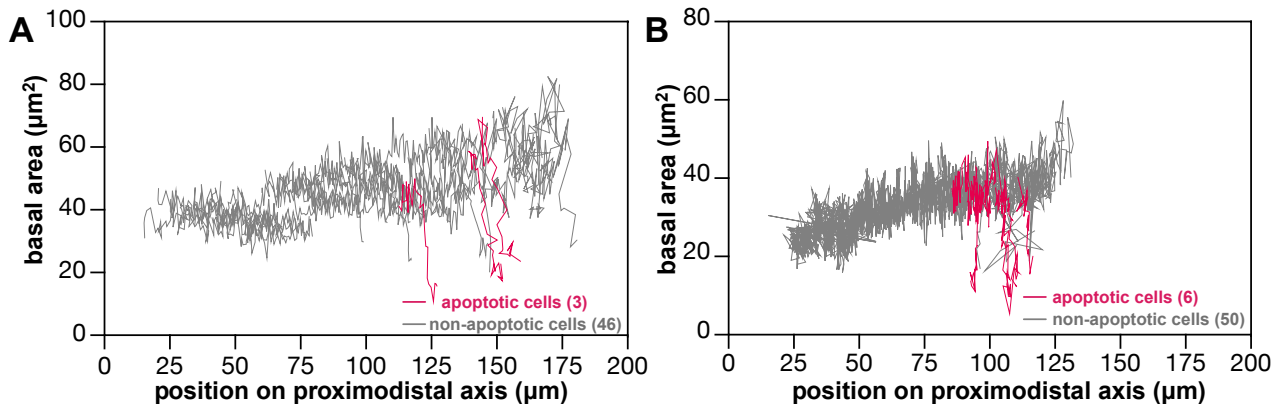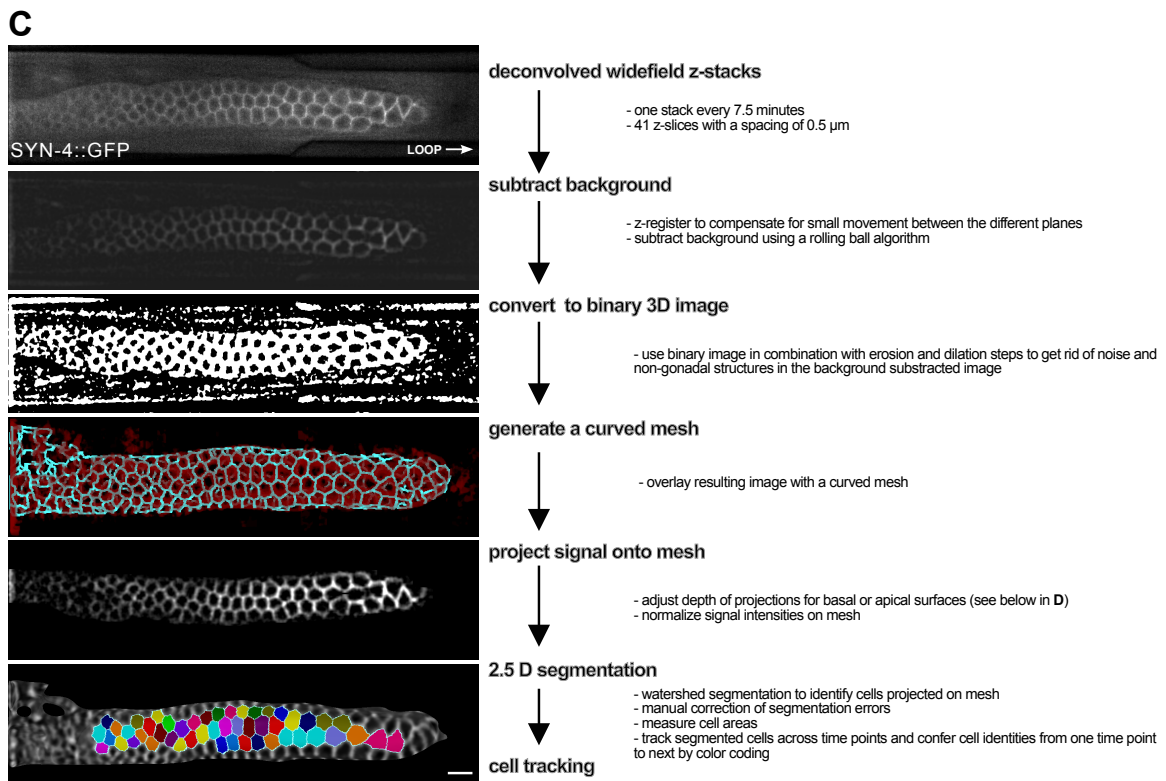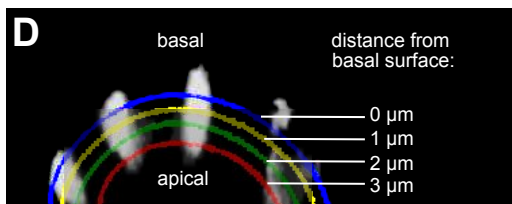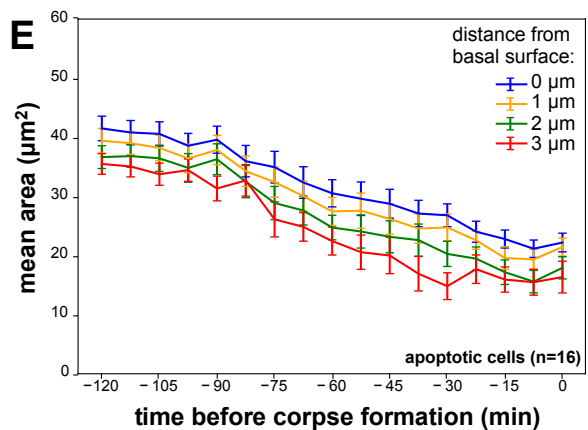

1038 **Suppl. Fig. S1 related to Fig. 1**

1039 (A, B) Results of cell tracking experiments in two additional wild-type animals as described in  
1040 **Fig. 1F**. (C) MorphographX workflow to track germ cells as described in the **extended**  
1041 **methods section**. Scale bar is 10  $\mu\text{m}$ . (D) Projections of increasing depths were generated to  
1042 measure the basal, middle and apical areas in MorphographX. (E) Plot showing the decrease  
1043 in mean area  $\pm$ SEM of apoptotic cell size before corpse formation in projections of increasing  
1044 depths.  
1045

Figure S2

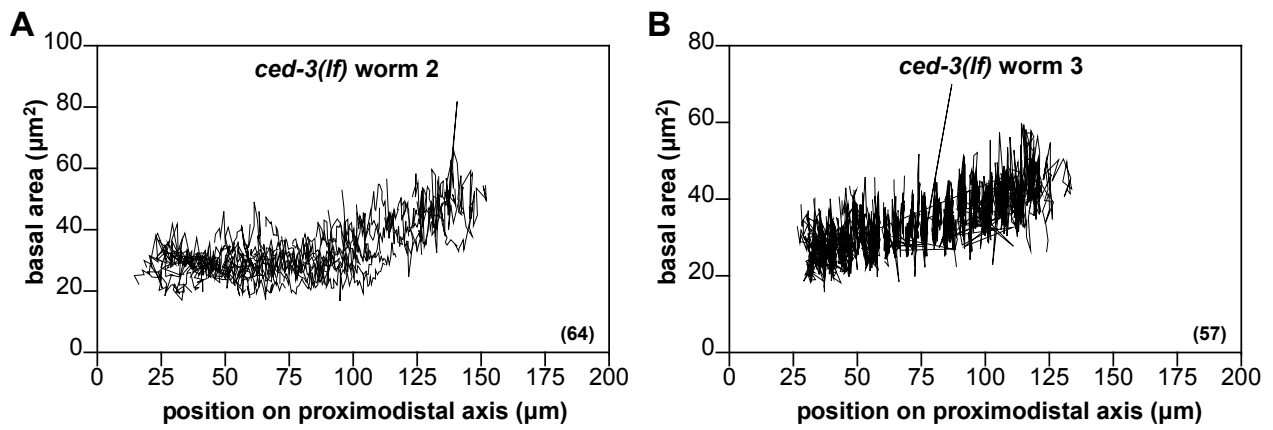

1046

1047 **Suppl. Fig. S2 related to Fig. 2**

1048 (A, B) Results of germ cell tracking experiments in two additional *ced-3(lf)* animals, as  
1049 described in Fig. 2A.

1050

Figure S3

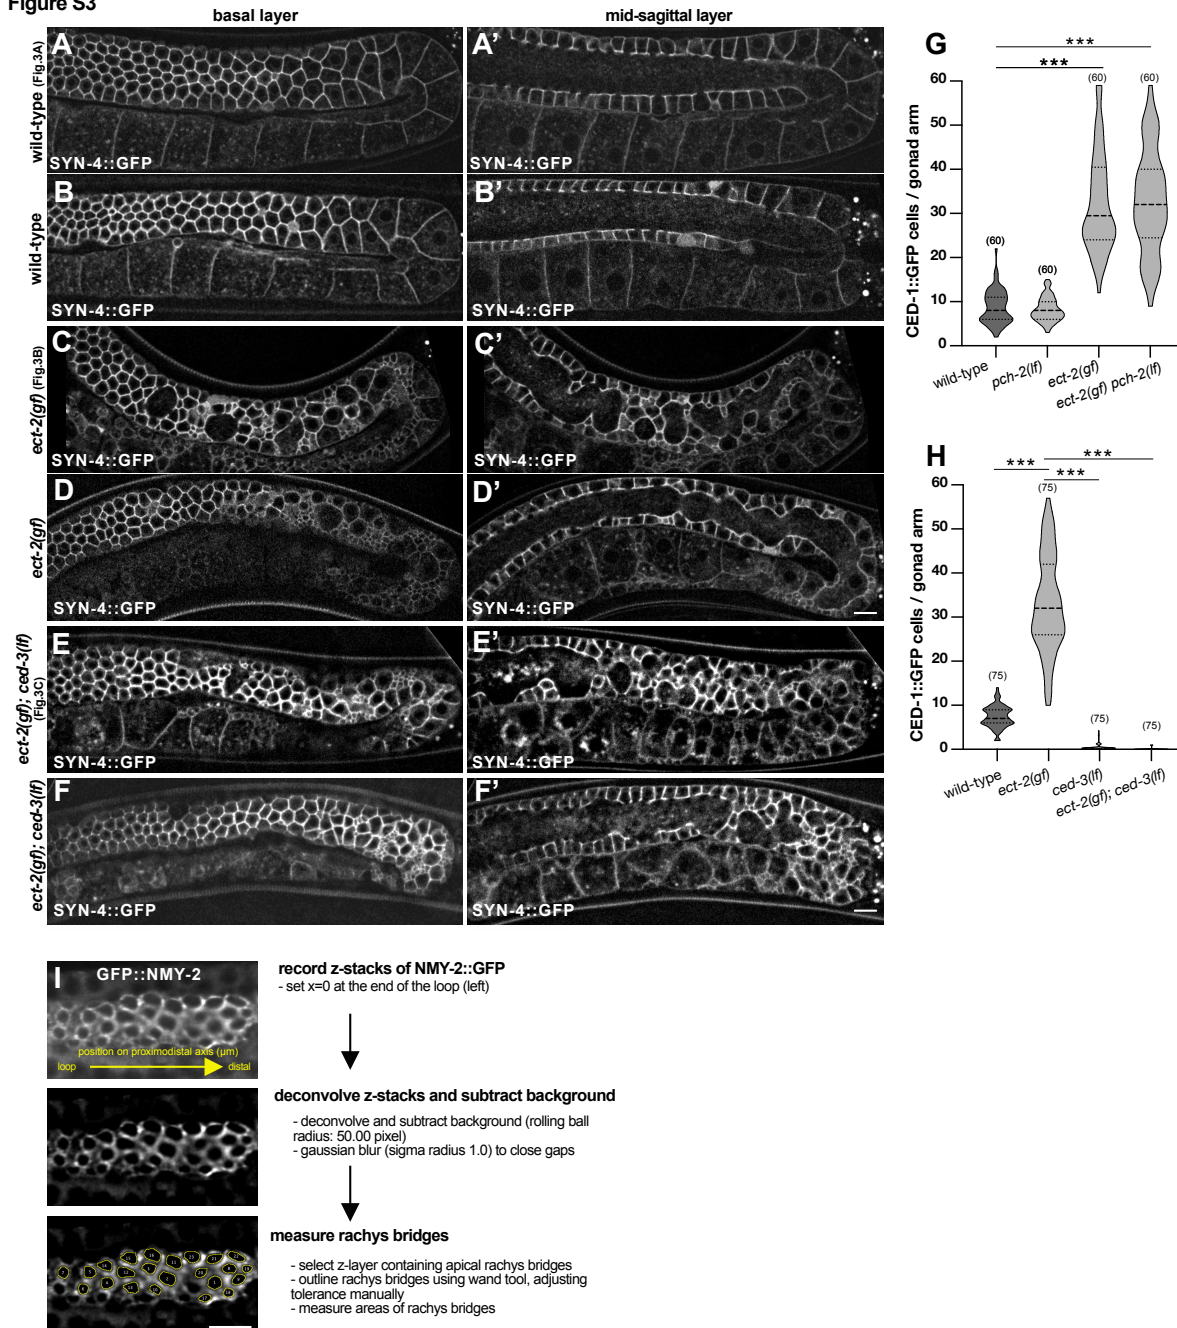

1051

1052 **Suppl Fig. S3 related to Fig. 3**

1053 (A-F') Full views of the SYN-4::GFP membrane marker in the gonad arms of the animals  
 1054 that are shown in Fig. 3A-C. For each genotype, one additional example is shown. Panels A-  
 1055 F show basal and panels A'-F' mid-sagittal sections. The scale bar is 10  $\mu$ m. (G, H) Violin  
 1056 plots showing the number of CED-1::GFP positive apoptotic cells per gonad arm in one-day-  
 1057 old adults of the indicated genotypes. (I) Workflow used to measure the rachis bridge area  
 1058 in Fig. 3G, Fig.5C, F & S5E, as described in the **extended methods section**. Statistical  
 1059 analysis was done as described in the legend to Fig. 3 and **suppl. Tab. S1**. The scale bar is 10  
 1060  $\mu$ m.

Figure S4

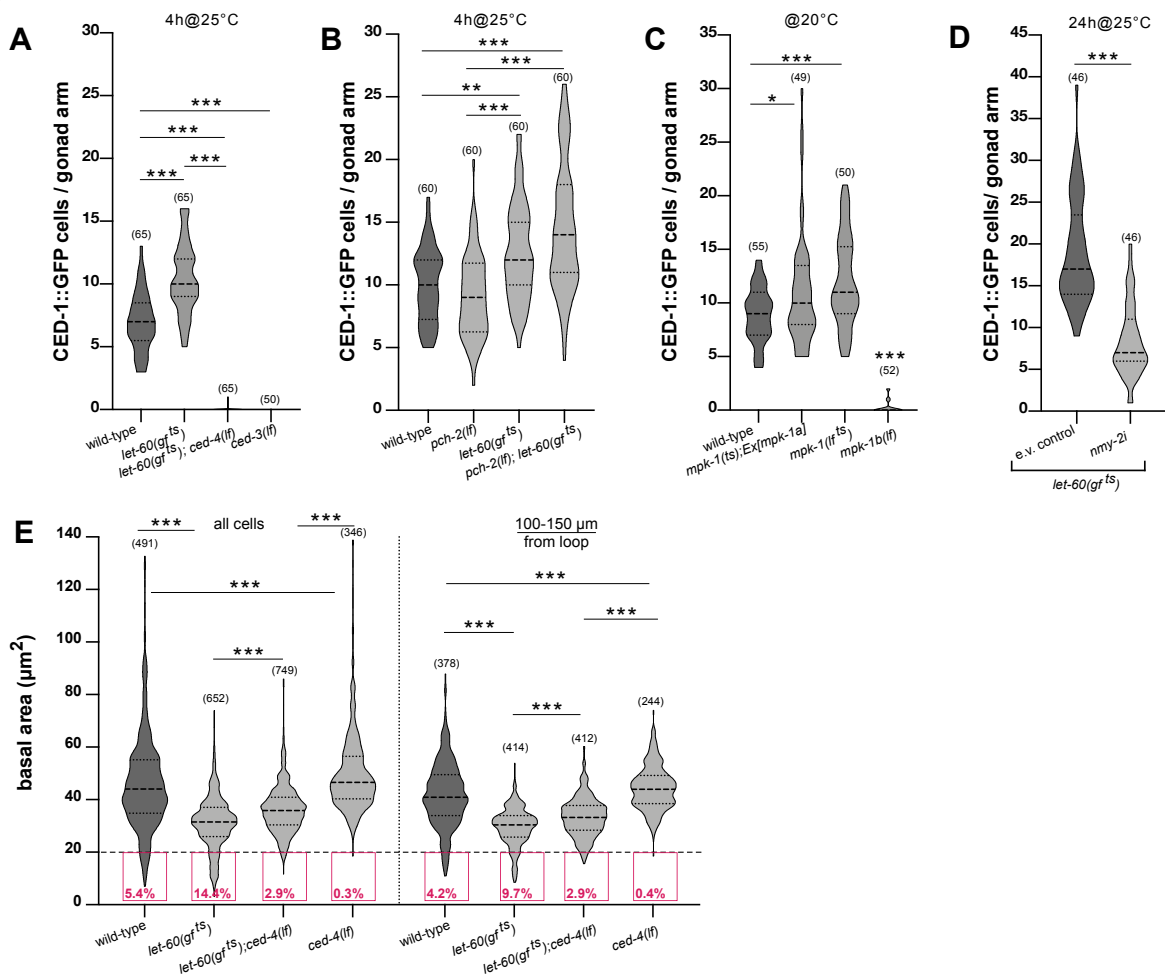

1061  
1062

**Suppl. Fig. S4 related to Fig.4**

1063 (A) Violin plot showing the number of CED-1::GFP positive apoptotic germ cells per gonad  
1064 arm in one-day-old adults of the indicated genotypes after a 4-hour up-shift to the restrictive  
1065 temperature (4h@25°C). (B) Violin plot showing the number of CED-1::GFP positive  
1066 apoptotic germ cells of the indicated genotypes grown at 20°C for 68 hours and incubated for  
1067 4 hours at the restrictive temperature of 25°C. (C) Violin plot showing the number of CED-  
1068 1::GFP positive apoptotic germ cells per gonad arm in one-day-old adults of the indicated  
1069 genotypes continuously grown at 20°C (baseline control for Fig. 4B, right). (D) Violin plot  
1070 showing the number of CED-1::GFP positive apoptotic germ cells per gonad arm in one-day-  
1071 old adults after *nmy-2* RNAi treatment in the *let-60(gf<sup>ts</sup>)* background from the L4 stage with a  
1072 simultaneous 24-hour up-shift to 25°C (24h@25°C). (E) Violin plot for the basal cell areas in  
1073 the 0 – 150 μm and 100 – 150 μm regions, besides the 50-100 μm region shown in Fig. 4D.  
1074 Statistical analysis was done as described in the legend to Fig. 4 and suppl. Tab. S1. Scale  
1075 bars are 10 μm.



Figure S5

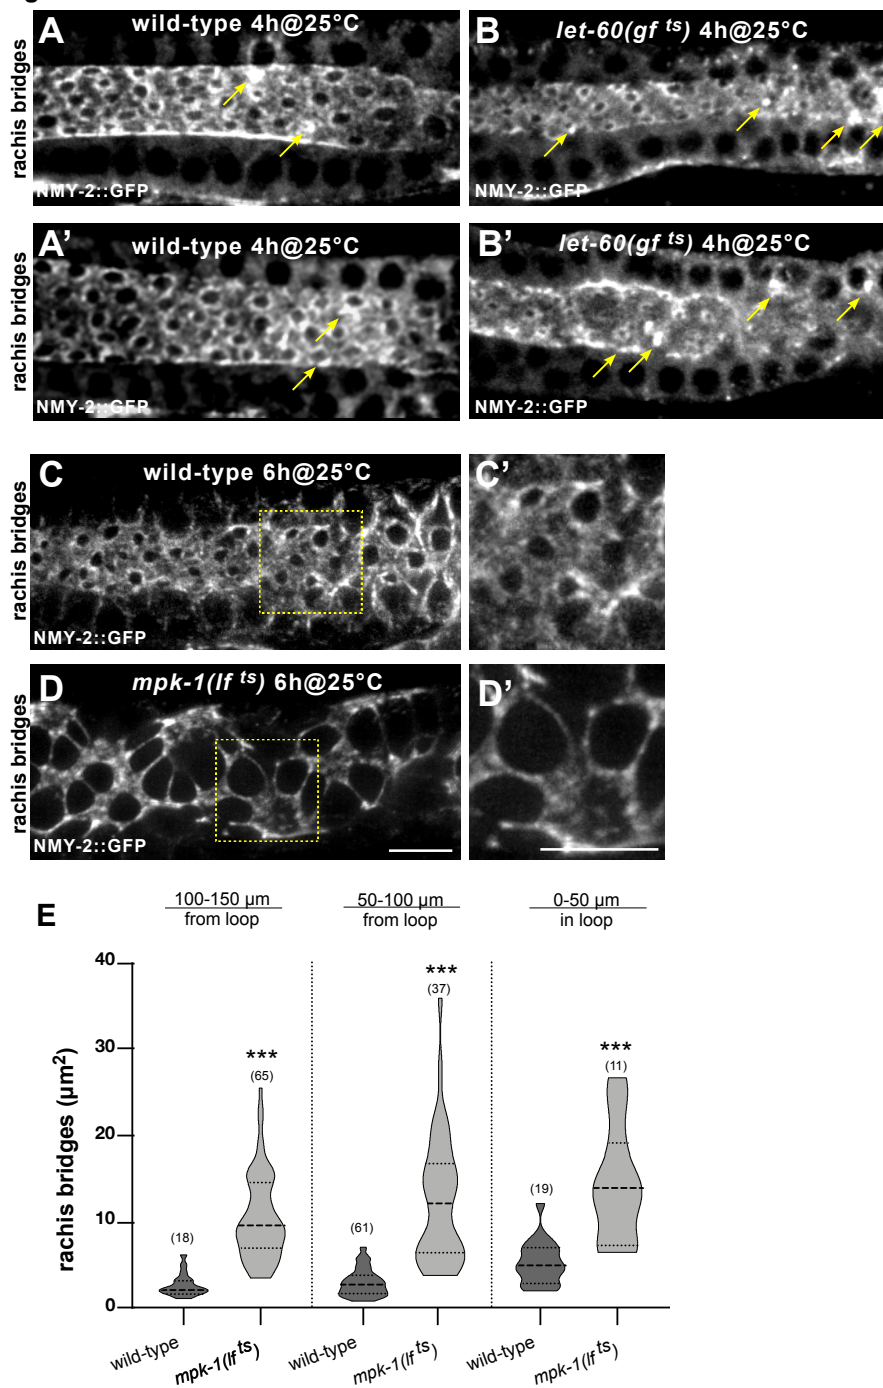

1076  
1077

1078

**Supp. Fig. S5 related to Fig. 5**

1079

(A-B') Additional examples of the rachis bridges outlined by NMY-2::GFP in wild-type and

1080

*let-60(gf<sup>ts</sup>)* animals. Note the yellow arrows pointing to fully enclosed rachis bridges appearing

1081

as bright NMY-2::GFP spots. (C-D) Rachis bridges outlined by NMY-2::GFP in young wild-

1082

type and *mpk-1(lf<sup>ts</sup>)* adults after a 6-hour up-shift to the restrictive temperature of 25°C. The

1083

shorter, 4 hours inactivation is shown in Fig. 5D-E. (E) Violin plots showing the size of the

1084

rachis bridges in wild-type and *mpk-1(lf<sup>ts</sup>)* mutants in the three indicated gonad regions after a

1085

6-hour incubation at 25°C. Three animals were analyzed for each genotype. Scale bars are 10

1086

$\mu\text{m}$ .

Figure S6

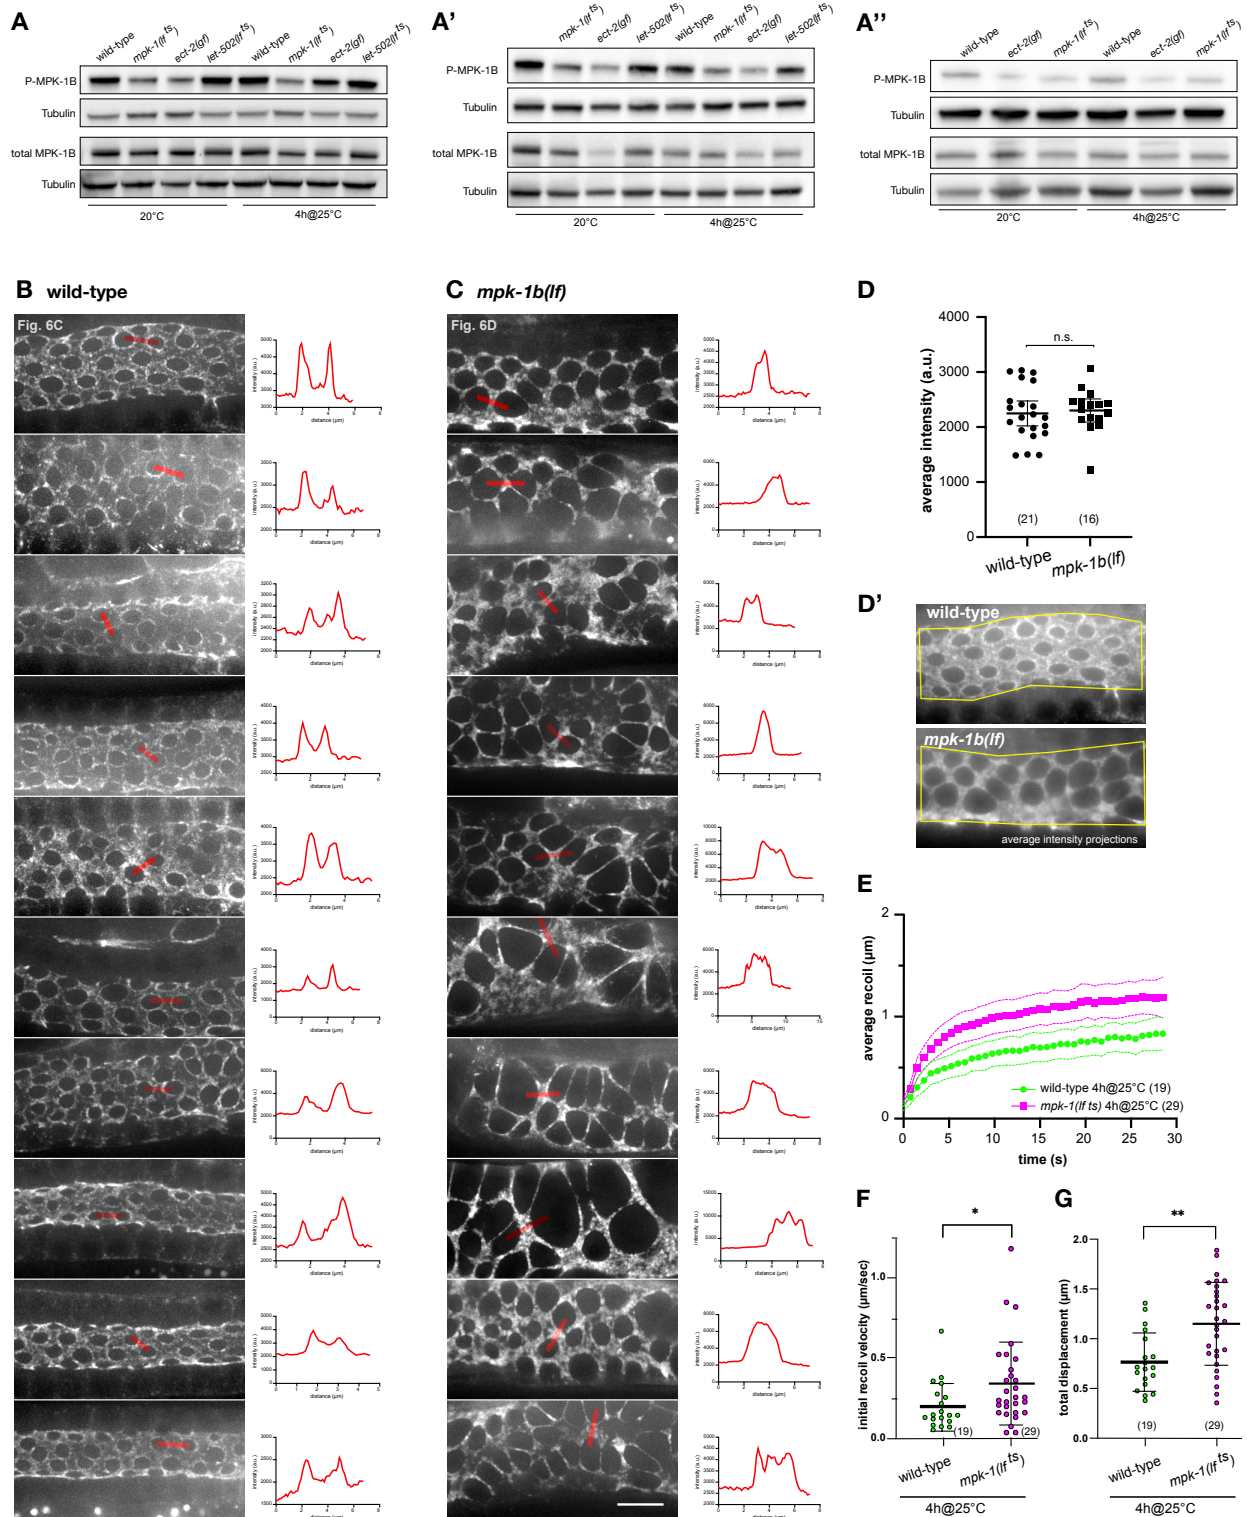

1087  
1088

1089

1090

1091

1092

1093

1094

**Supp. Fig. S6 related to Fig. 6**

(A) Western blots used for the quantification of P-MPK-1B and total MPK-1B protein levels shown in **Fig. 6B**. One-day-old adults of the indicated genotypes were incubated either at 20°C for 72 hours after the L1 stage or for 4 hours at the restrictive temperature of 25°C before analysis. (B) Additional examples of NMY-2::GFP localization in the late pachytene region (50-100μm from the loop) of wild-type and (C) *mpk-1(lf)* mutants one-day old adults (66-68

1095 hours post-L1 arrest). Maximum intensity z-projections of flat field-corrected raw images  
1096 (without deconvolution) are shown. The top panels are the same animals as in **Fig. 6C&D**.  
1097 Relative intensity profiles along the regions indicated with red bars are shown to the right of  
1098 each panel. Note the two peaks corresponding to the NMY-2::GFP signal at the rachis bridges  
1099 in the wild-type, as opposed to the single peaks in *mpk-1b* mutants. **(D)** Quantification of NMY-  
1100 2::GFP levels in wild-type and *mpk-1b(lf)* animals. Average intensity z-projections of flat field-  
1101 corrected raw images were used for quantification of the mean NMY-2::GFP intensities on the  
1102 apical cortex, as illustrated in **(D')**. **(E)** Mean radial displacement (recoil) plotted against time  
1103 after incision, **(F)** Initial recoil velocities, and **(G)** total recoil in wild-type and *mpk-1(lf<sup>ts</sup>)*  
1104 mutants grown for 4 hours at 25°C, calculated as described in the legend to **Fig. 6 F-H** and in  
1105 materials and methods. See **suppl. Tab. S1** for the individual measurements of all animals  
1106 scored. The horizontal bars indicate the mean values, the error bars the 95% CI and the numbers  
1107 in brackets the numbers of animals analyzed. Scale bar in **(C)** is 10 μm.  
1108

1109 **Supplementary movies**

1110

1111 **Movie S1** Germ cell tracking of the wild-type animal shown in **Fig. 1B**.

1112

1113 **Movie S2** Germ cell tracking of the *ced-3(lf)* mutant animal shown in **Fig. 2A**.

1114

1115 **Movie S3** Recoil after laser incision in the wild-type animal shown in **Fig. 6E**.

1116

1117 **Movie S4** Recoil after laser incision in the *mpk-1b(lf)* animal shown in **Fig. 6E'**.

1118

1119 **Extended methods**

1120

1121 **Image processing**

1122 Images were processed using the Huygens Deconvolution platform (SVI, Center for  
1123 Microscopy and Image Analysis, University of Zürich) or using the YacuDecu implementation  
1124 of CUDA-based Richardson Lucy deconvolution in Matlab to remove background signals.

1125

1126 **Germ cell size measurements and tracking**

1127 *Generation of curved meshes and cell segmentation*

1128 Pre-processing of deconvolved image stacks of the SYN-4::GFP membrane marker at each  
1129 time point was done using Fiji software [70], with z-registration to compensate for small  
1130 movements of the worm in the microfluidic device and additional background subtraction (see  
1131 attached Fiji scripts). Cells were tracked over time using a custom-made Python script attached  
1132 below with the MorphoGraphX software package [33], which enables the analysis of cell  
1133 shapes on curved surfaces as illustrated in **suppl. Figure S1C**. As a first step, regions of the  
1134 distal gonad arms with pachytene stage germ cells were selected and processed using a  
1135 combination of dilation and erosion (the highest or lowest value of a pixel and a defined  
1136 neighborhood is taken, respectively). In short, the selection was based on the assumption that  
1137 germline membranes form a somewhat regular polygonal pattern. When dilating this image  
1138 with a bit more than half a cell diameter, the whole gonad fills up and the opposite erosion does  
1139 not reverse the image to its original, but leaves the gonad filled. Other patterns were selected  
1140 against, also using the fact that the position of the worm is always very similar when using the  
1141 microfluidic devices. After gonad selection, a mesh was generated based on a threshold-like

1142 mechanism that scans the image from the top to the bottom. After smoothening the mesh, its  
1143 quality was checked visually and any artifacts were repaired by manual local smoothening.  
1144 Such artifacts occurred in roughly 10% of the time points and were caused for example by  
1145 signals that did not arise from germline cells or by small regions in the germline with relatively  
1146 low signal intensity. The z-registered and background-subtracted 3D image was then projected  
1147 onto the curved mesh enabling the analysis of the basal surface. Cells were segmented using a  
1148 watershed algorithm for curved surfaces. The resulting segmentation of cells was checked and,  
1149 if necessary, manually corrected. Areas at different distances from the basal surface (e.g. the  
1150 apical surface) were obtained as follows. Using MorphoGraphX, a new mesh was created at 1,  
1151 2, or 3  $\mu\text{m}$  absolute distance from the basal mesh on the apical side (**suppl. Figure S1D**). The  
1152 signal of the registered and background-subtracted image was then projected onto this new  
1153 mesh and cells were again segmented using a watershed algorithm.

1154

#### 1155 *Germ cell tracking on curved meshes*

1156 The gonad arms move considerably in the microfluidic device even when the animal is largely  
1157 immobile, this is necessary to allow egg laying and to maintain normal gonad physiology [12].  
1158 Therefore, cell tracking was performed manually by manually overlaying meshes of two  
1159 subsequent time points and conferring cell identities from one mesh to another. In this way, it  
1160 was possible to compare the patterns globally and reliably identify cells across the time points.

1161

#### 1162 *Measuring cell sizes*

1163 Basal areas of the segmented cells were obtained using MorphoGraphX, which directly  
1164 measures the mesh area occupied by each cell. Basal cell areas from single images were  
1165 obtained using the same scripts but with different threshold values. The segmentation of the  
1166 apoptotic cells was checked manually and improved if necessary. Some cells could not be  
1167 analyzed at 3  $\mu\text{m}$  (or rarely at 2  $\mu\text{m}$ ) distance from the basal surface at some time points due  
1168 to variations in cell height. In these cases, the cells were excluded from the analysis at the  
1169 corresponding depths and time points. Since the membrane signal decreases most apically, the  
1170 number of manual improvements increased with increasing depth. Cell areas were obtained  
1171 directly from the respective meshes.

1172

1173 *Tracking of apical rachis bridges*

1174 To measure the rachis bridge area labeled with NMY-2::GFP in the time-lapse recordings  
1175 shown in **Fig. 1H**, the center position of each apoptotic cell was obtained from the  
1176 MorphographX tracking data and used to create a cropped .tiff-file with the apoptotic cell  
1177 positioned in the image center, e.g. in **Fig. 1C**, allowing us to track cells over time. The rachis  
1178 bridge opening and apical cell shape of the apoptotic cell and two neighboring cells, one at the  
1179 distal and one at the proximal side, were outlined manually using Fiji software [70]. For each  
1180 cell, a single z-plane was selected, which was used to measure the rachis bridge and the apical  
1181 membrane area. Since the rachis bridge opening is only visible in very few planes and the  
1182 gonads are not completely straight, the area of a part of the neighboring cells was sometimes  
1183 determined in different z-sections. To minimize systematic errors, due to the fact that the apical  
1184 surface is curved, apoptotic cells positioned in the middle of the gonads were selected for  
1185 analysis as their apical surface is relatively flat.

1186

1187 *Registration of cell positions*

1188 Variation in the positions of cells along the length of the gonad was decreased by a registration-  
1189 like process: two cells far apart and located in the regular part of the tissue were selected and  
1190 tracked throughout the movie. Cell positions were translated such that the position of the first  
1191 cell changed linearly over time. This was achieved using a linear fit between the time and x-  
1192 position of this first cell. Subsequently, the x-axis was scaled such that the distance between  
1193 the first and second cell increased linearly over time and the position of the first cell was not  
1194 changed. This scaling was based on a linear fit between time and distance between the first and  
1195 second cell.

1196

1197 *Measurement of rachis bridge areas in confocal image stacks*

1198 The areas of the rachis bridge were measured using Fiji software [70], as illustrated in **suppl.**  
1199 **Fig. S3I**. Deconvolved or unprocessed confocal z-stacks were rotated and cropped to set the x-  
1200 position ( $x=0$ ) to the end of the gonad loop. The background was subtracted (rolling ball radius  
1201 50) and a Gaussian Blur (sigma  $r=1$ ) was applied. The wand tool was used to manually select  
1202 openings (black area) of the rachis bridges and their respective areas were measured with the  
1203 Fiji built-in measurement function. If necessary, the tolerance of the wand tool was adjusted  
1204 when selecting the openings. Since the rachis bridge of a cell is only visible in a few z-stacks,  
1205 different z-stacks were selected for different cells.

1206

1207

## 1208 **Scripts used for image processing**

1209 **script in Fiji used to crop and rotate single stacks (mgx preprocess.ijm, used only for single stacks analysis)**

```
1210 {
1211 file=fileList[f];
1212 if (!File.isDirectory(dir+file));
1213 {
1214 run("Bio-Formats Importer", "open="+dir+file+" windowless");
1215 title=getTitle();
1216 slices=nSlices;
1217 run("Properties...", "unit=um pixel_width=0.2 pixel_height=0.2 voxel_depth=0.66");
1218 run("Subtract Background...", "rolling=50 stack");
1219 //run("Remove Outliers...", "radius=3 threshold=10 which=Bright stack");
1220 run("Gaussian Blur...", "sigma=1 stack");
1221 run("Subtract Background...", "rolling=50 stack");
1222 setSlice(round(slices/2));
1223 run("Enhance Contrast", "saturated=0.35");
1224 setTool("line");
1225 waitForUser("Draw a distal to proximal line.");
1226 getLine(x1, y1, x2, y2, lineWidth);
1227 lineAngle=atan2((y2-y1),(x2-x1));
1228 rotateAngle=(-lineAngle+PI)/PI*180;
1229 run("Rotate... ", "angle="+rotateAngle+" grid=0 interpolation=Bicubic enlarge stack");
1230 setTool("polygon");
1231 waitForUser("Crop the gonad");
1232 run("Crop");
1233 run("Clear Outside", "stack");
1234 waitForUser("select the bottom layer");
1235 bottom=getSliceNumber()-1;
1236 waitForUser("select the top layer");
1237 top=getSliceNumber()+1;
1238 run("Slice Remover", "first="+top+" last="+slices+" increment=1");
1239 run("Slice Remover", "first=1 last="+bottom+" increment=1");
1240 setSlice(round(nSlices/2));
1241 run("Enhance Contrast", "saturated=0.35");
1242 path=resultDir+title+"_cropped.tif";
1243 saveAs("Tiff", path);
1244 close();
1245 }
1246 }
```

1247

1248 **Script in Fiji to remove background from single stacks and germ cell tracking stacks**  
1249 **(pipe\_a\_fiji\_background.ijm)**

1250

```
1251 showMessage("Choose the first file (must end with '1.tif') to subtract the background from. Other files must have
1252 same naming convention.")
1253 open("")
1254 image_name = getInfo("image.filename")
1255 core_input_name = split(image_name, "(1.tif)")
1256 core_input_name = core_input_name[0]
1257 input_directory = getInfo("image.directory")
1258 close();
1259 showMessage("Choose the last file (must start with "+core_input_name+") to subtract the background from.")
1260 open("")
1261 image_name = getInfo("image.filename")
```

```
1262 last_number = split(image_name, ".tif")
1263 last_number = split(last_number[0], "+core_input_name+")
1264 last_number = last_number[1];
1265 last_number = parseInt(last_number);
1266 close();
1267 target = getDirectory("Choose directory to save background-subtracted images to (eg meshes_etc)");
1268
1269 for (i=1; i<last_number+1; i++) {
1270     open(input_directory+"/"+core_input_name+i+".tif");
1271     run("Gaussian Blur...", "sigma=2 stack");
1272     run("Subtract Background...", "rolling=20 stack"); //changed from 10 to 20
1273     run("Remove Outliers...", "radius=2 threshold=50 which=Bright stack");
1274     run("StackReg", "transformation=[Rigid Body]");
1275     saveAs("Tiff", target+"/a_no_background_"+i+".tif");
1276     close();
1277 }
```

### 1279 **Script in Python to generate 2.5D projections and segmented cells in MorphoGraphX** 1280 **(pipe\_b\_morphographx\_segment)**

```
1281 """Second step of segmentation and tracking of germline movies (with MorphoGraphX):
1282 - It performs dilation and erosion steps to get rid of (most) signals that do not arise from germ cells before the turn
1283 of the gonad.
1284 - It creates a curved mesh (2.5D) through basal membranes
1285 - It projects the image signal on this mesh and segments the projections by watershedding.
1286 Prerequisites: folder with .tif files generated by pipe_a_fiji_background.ijm
1287 Before running the code from MorphoGraphX, adjust the two paths in the first lines below
1288 """
1289
1290 srcDir= # folder containing the no_background files
1291 targDir= # folder where to save the files
1292 for i in range(1,2):
1293     Stack.Open(srcDir+'a_no_background_'+str(i)+'.tif', 'Main', '0')
1294     Global.SetCurrentStack('Main', '0')
1295     Stack.Binarize('10') #This variable is not always the same: wt, ced: 10; nmy2: 80 or 200
1296     Stack.Save(targDir+'b_binary_'+str(i)+'.tif', 'Work', '0', '5')
1297     Stack.Copy_Work_to_Main_Stack()
1298     Global.SetCurrentStack('Main', '0')
1299     Stack.Change_Voxel_Size('0.21', '0.21', '0.5')#depends on resolution movie/stacks
1300     Stack.Reverse_Axes('No', 'No', 'Yes')
1301     Stack.Copy_Work_to_Main_Stack()
1302     Global.SetCurrentStack('Work', '0')
1303
1304     ##Get rid of background noise
1305     Stack.Erode('1', '1', '1', 'No')
1306     Stack.Dilate('1', '1', '1', 'No')
1307
1308     ##Get rid of horizontal lines
1309     Stack.Dilate('12', '0', '0', 'No')
1310     Stack.Erode('0', '10', '0', 'No')
1311     Stack.Dilate('0', '10', '0', 'No')
1312     Stack.Combine_Stacks('Product')
1313
1314     ##Get rid of vertical lines and structures that are not continuous in the x direction
1315     Stack.Copy_Work_to_Main_Stack()
1316     Stack.Dilate('12', '1', '0', 'No')
1317     Stack.Erode('25', '10', '0', 'No')
1318     Stack.Dilate('25', '10', '0', 'No')
1319     Stack.Open(srcDir+'a_no_background_'+str(i)+'.tif', 'Main', '1')
```



```
1321 Global.SetCurrentStack('Main', '1')
1322 Stack.Change_Voxel_Size('0.21', '0.21', '0.5')#depends on resolution movie/stacks
1323 Stack.Autoscale_Stack()
1324 Stack.Apply_Transfer_Function('0', '0', '0', '1')
1325 Stack.Reverse_Axes('No', 'No', 'Yes')
1326 Stack.Copy_Work_to_Main_Stack()
1327 Stack.Swap_or_Copy_Stack_1_and_2('Main', '1 <-> 2')
1328 Global.SetCurrentStack('Work', '0')
1329 Stack.Combine_Stacks('Product')
1330
1331 ##Get rid of vertical lines that span the whole gonad
1332 Stack.Copy_Work_to_Main_Stack()
1333 Stack.Erode('0', '75', '0', 'No')#gonad no longer visible
1334 Stack.Dilate('0', '75', '0', 'No')
1335 Stack.Combine_Stacks('Subtract')
1336 Stack.Save(targDir+'c_gonad_only_'+str(i)+'.tif', 'Work', '0', '5')
1337
1338 ##Edge detect
1339 Stack.Copy_Work_to_Main_Stack()
1340 Stack.Edge_Detect('70.0', '2.0', '0.3', '15000')
1341 Stack.Cimg_Median_Blur('3')
1342 #Close holes
1343 Stack.Dilate('25', '0', '0', 'No')
1344 Stack.Erode('25', '0', '0', 'No')
1345
1346 ##Generate Mesh
1347 Stack.Copy_Work_to_Main_Stack()
1348 Mesh.Marching_Cubes_Surface('3', '5000')
1349 Mesh.Smooth_Mesh('12')
1350 Mesh.Subdivide()
1351 Mesh.Smooth_Mesh('10')
1352 Mesh.Subdivide()
1353 Mesh.Smooth_Mesh('10')
1354
1355 ##Projecting the original image after background subtraction on mesh
1356 Stack.Open(srcDir+'a_no_background_'+str(i)+'.tif', 'Main', '0')
1357 Global.SetCurrentStack('Main', '0')
1358 Stack.Change_Voxel_Size('0.21', '0.21', '0.5')
1359 Stack.Autoscale_Stack()
1360 Stack.Apply_Transfer_Function('0', '0', '0', '1')
1361 Stack.Reverse_Axes('No', 'No', 'Yes')
1362 Stack.Copy_Work_to_Main_Stack()
1363 Global.SetCurrentStack('Work', '0')
1364 Mesh.Project_Signal('No', '0', '5', '0.0', '60000.0')
1365 Mesh.Difference_of_Gaussians('1.0', '5.0')
1366
1367 ##Watershed segmentation of projected signal
1368 Mesh.Auto_Seeding('3.0')
1369 Mesh.Watershed_Segmentation('20000')
1370 Mesh.Fix_Corners('Yes', 'Yes', '5')
1371
1372 ##For generating snapshots to check the quality and saving the mesh
1373 Mesh.Normalize_Signal('10')
1374 Global.Snapshot(targDir+'meshview_'+str(i)+'.png', 'false', '0', '0', '1.0', '95')
1375 Mesh.Save(targDir+'mesh_'+str(i)+'.mgxm', 'no', '0')
1376
1377 ##If mesh quality was not satisfactory, the mesh was improved manually and projection and subsequent steps
1378 were repeated
```

1379 ##In addition, segmentation was improved manually if necessary. In that case, that steps after the segmentation  
1380 were repeated  
1381  
1382
